# Supplementary material for: Coding exon-structure aware realigner (CESAR) utilizes genome alignments for accurate comparative gene annotation
Source: PubMed Central journal article supplement — Nucleic Acids Res. 2016 Mar 25;44(11):e103. doi: 10.1093/nar/gkw210 (PMC4914097; doi:10.1093/nar/gkw210), 2016-03-25
Supplement: supp_gkw210_nar-00328-met-k-2016-File010.pdf [file supp_gkw210_nar-00328-met-k-2016-File010.pdf]

# **Coding Exon-Structure Aware Realigner (CESAR) utilizes genome alignments for accurate comparative gene annotation**

Virag Sharma<sup>1,2</sup>, Anas Elghafari<sup>1,2,3</sup> and Michael Hiller<sup>1,2\*</sup>

<sup>1</sup>Max Planck Institute of Molecular Cell Biology and Genetics, Dresden, Germany

<sup>2</sup>Max Planck Institute for the Physics of Complex Systems, Dresden, Germany

<sup>3</sup>Technical University, Dresden, Germany

\*To whom correspondence should be addressed:

hiller@mpi-cbg.de

## **Supplementary Material**

The Supplementary Material contains

- Figures S1 – S23
- Tables S1 – S5

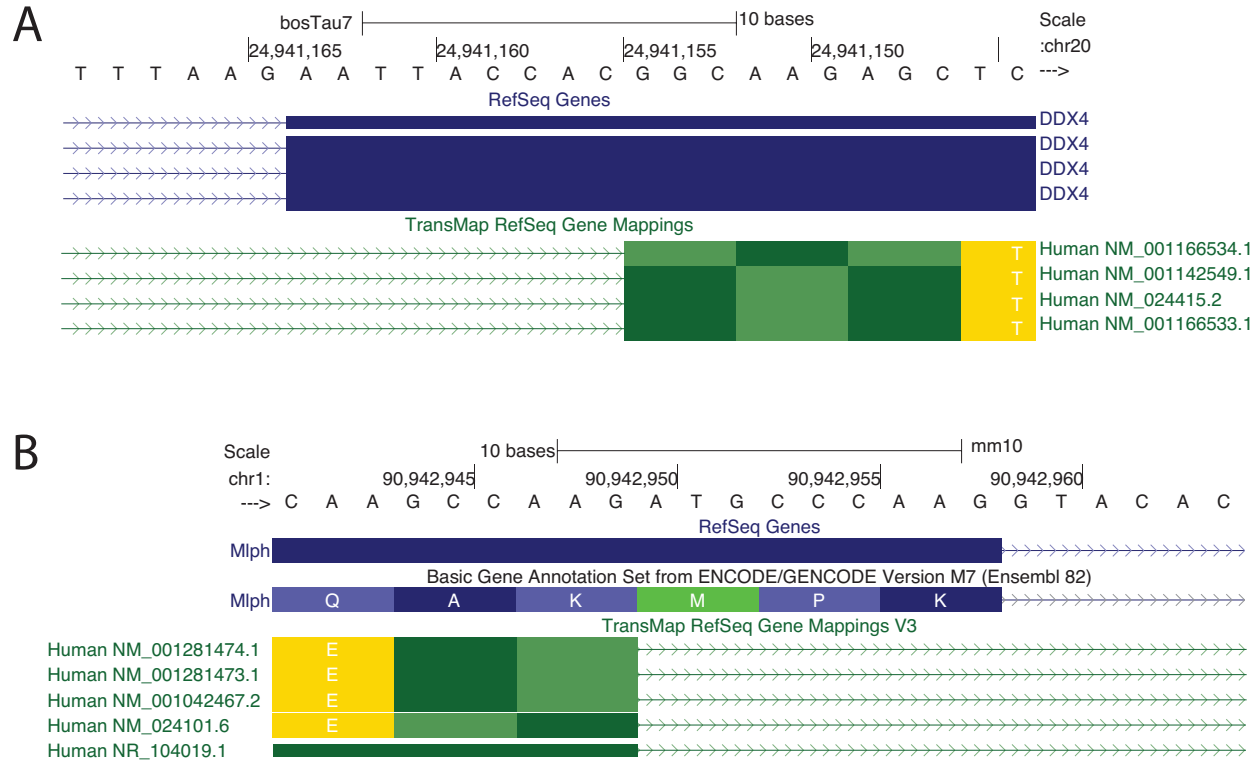

**Supplementary Figure S1:** Projecting the coordinates of aligned exons in a genome alignment does not identify the correct splice sites for both cases shown in Figure 1C main text.

(A) TransMap [1-3] annotation of the human *DDX4* gene in the cow genome. The acceptor splice site of cow *DDX4* is shifted by 9 bp upstream (cow RefSeq annotation). TransMap shows a non-consensus AC acceptor.

(B) TransMap annotation of the human *MLPH* gene in the mouse genome. The donor site is shifted by 9 bp downstream (mouse RefSeq and GENCODE annotation). TransMap shows a non-consensus AT donor.

1. Zhu J, Sanborn JZ, Diekhans M, Lowe CB, Pringle TH, Haussler D: **Comparative genomics search for losses of long-established genes on the human lineage.** *PLoS Comput Biol* 2007, **3**:e247.
2. Stanke M, Diekhans M, Baertsch R, Haussler D: **Using native and syntenically mapped cDNA alignments to improve de novo gene finding.** *Bioinformatics* 2008, **24**:637-644.
3. Kuhn RM, Karolchik D, Zweig AS, Wang T, Smith KE, Rosenbloom KR, Rhead B, Raney BJ, Pohl A, Pheasant M, et al: **The UCSC Genome Browser Database: update 2009.** *Nucleic Acids Res* 2009, **37**:D755-761.

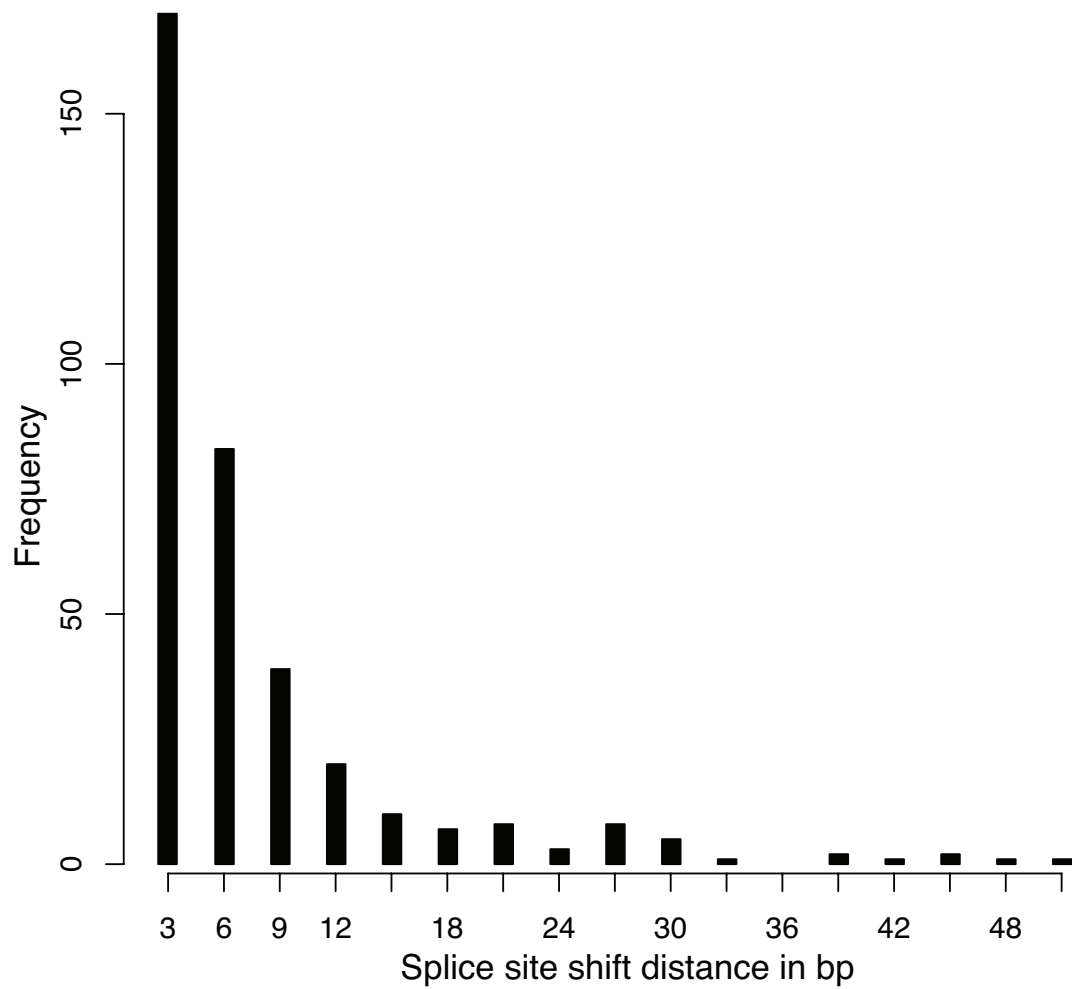

**Supplementary Figure S2:** Distances of splice site shifts.

Histogram of the distance between the human splice site and the shifted splice site is shown. The data are 360 exons where a splice site shift happened in the mouse, rat, dog or cow genome according to their RefSeq annotation.

## A true alignment

GACGTTAGGAAGGCAGAGGAGGAGCTGGGTGAGCTGGAGGCTAAGCT  
GACGTTAGGAAAGCAGAG---GAGCTGGGTGAGGTGGAGGCTAAGCT

## reported alignment

GACGTTAGGAAGGCAGAGGAGGAGCTGGGTGAGCTGGAGGCTAAGCT  
GACGTTAGGAAAGCA---GAGGAGCTGGGTGAGGTGGAGGCTAAGCT

## B true alignment

ACCTGGAGAATGCACTTTTGATCAAGATGAATGTGCGTTTACACAGG  
ACCTGGAGAATGCACTTTTGATCAAGAG---TGTGCATTTACACAGG

## reported alignment

ACCTGGAGAATGCACTTTTGATCAAGATGAATGTGCGTTTACACAGG  
ACCTGGAGAATGCACTTTTGATCAA---GAGTGTGCATTTACACAGG

## C true alignment

GGAAGTAGGAGCTGAACAGACAGACTTTCTGCGAGGGCCATTAGAG  
GGAAGTAGGAGCTGAA-----CTT---CGAGCGCCATTAGAG

## reported alignment

GGAAGTAGGAGCTGAACAGACAGACTTTCTGCGAGGGCCATTAGAG  
GGAAGTAGGAGCTGAA-----CTTCGAGCGCCATTAGAG

**Supplementary Figure S3:** Alignment ambiguities and difficulties in locating the exact position of insertion/deletions.

(A) There are 3 equivalent ways of placing the deleted GAG.

(B) Two equivalent ways of placing the 3 bp deletion. Both GAT or GAA in the reference can align to GAG in the query. (A) and (B) are regarded as “nearly identical” in Figure 4 main text and Supplementary Figures S4-S8.

(C) A 9 bp and a nearby 3 bp deletion in the true alignment are reported as a single 12 bp deletion. This alignment is regarded as “splice sites correct” in Supplementary Figures S4-S8 if the splice sites are correctly identified.

## Intact exons (no frameshift, identical splice sites)

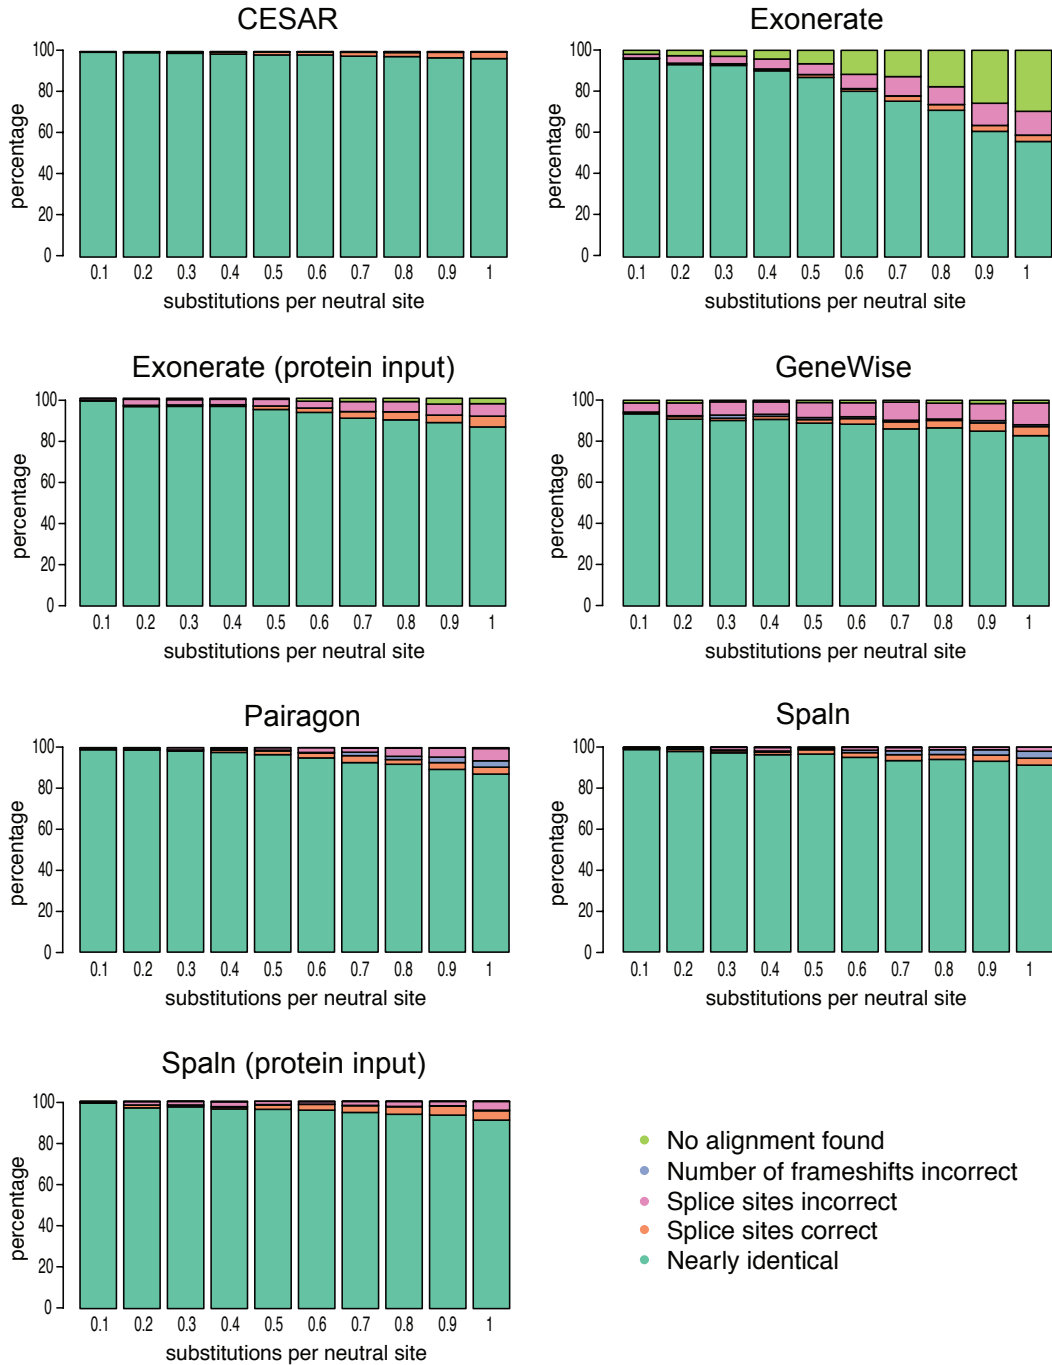

**Supplementary Figure S4:** Detailed breakdown of differences between the reported and true alignment for intact exons. Intact exons are defined as exons with identical splice sites and without any frameshift. “Nearly identical” alignments are alignments that are either identical to the true alignment or differ from the true alignments only in the position of an indel that we allow to be shifted by at most 6 bases up- or downstream. “Splice sites correct” are alignments where both splice sites are correctly aligned and the correct number of frameshifts (0 here) is reported but indel positions are shifted by more than 6 bp or a different number of indels is reported.

## Two spurious frameshifts ("no frameshift")

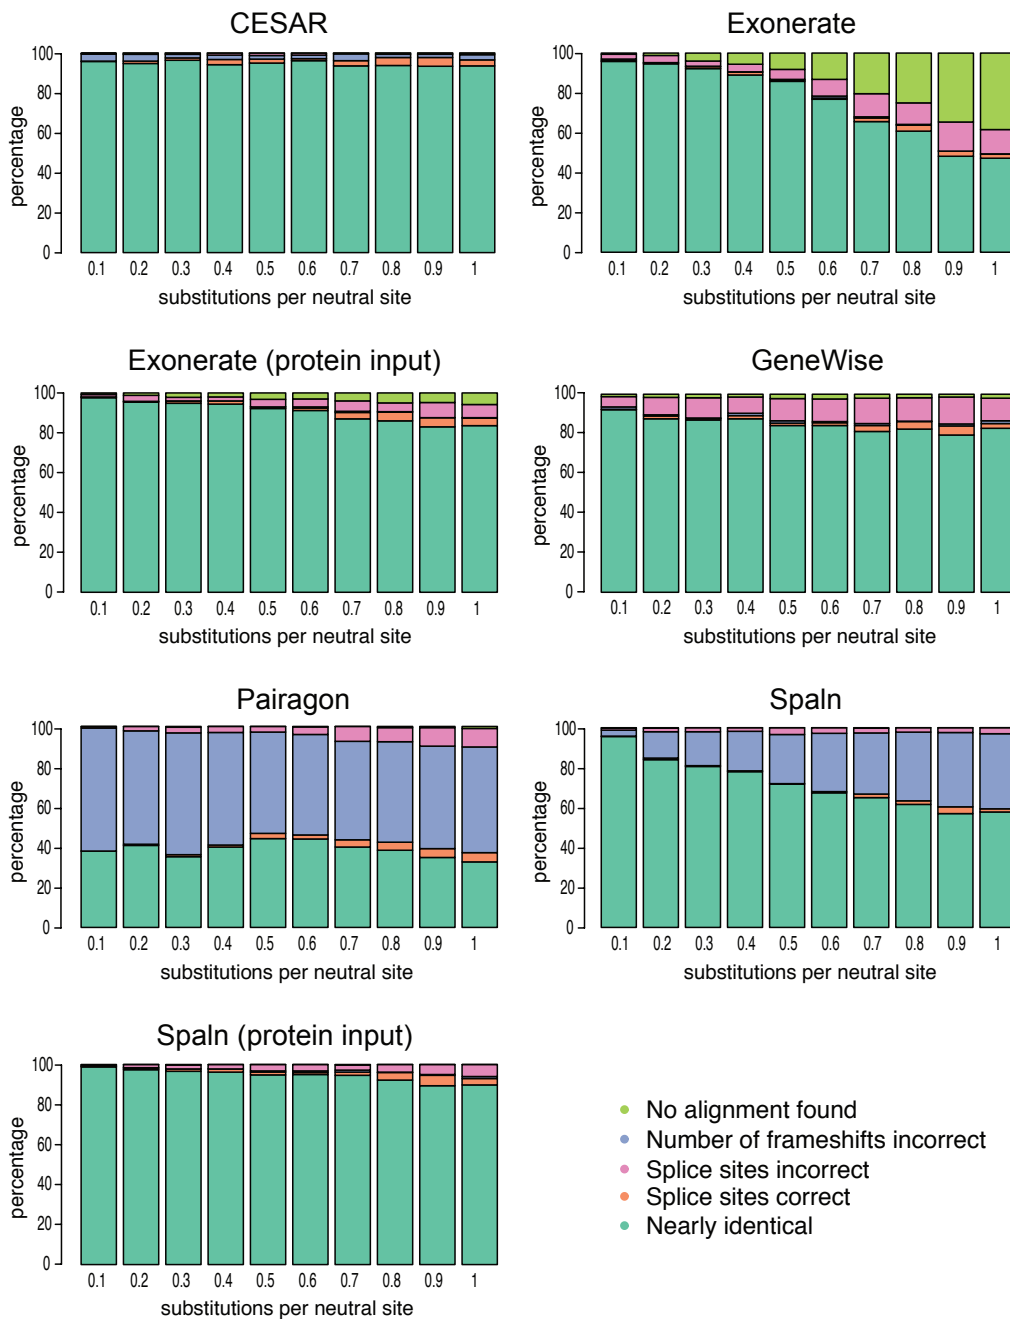

**Supplementary Figure S5:** Detailed breakdown of differences between the reported and true alignment for exons from the “no-frameshift” dataset. This dataset mimics the numerous cases of two nearby compensating frameshifts that we observed in genome alignments. Given that a single frameshift inactivates an exon, an alternative alignment with no frameshifts but a few codon substitutions is more plausible. In this dataset, we introduced two compensating frameshifting indels that are separated by 6 to 12 bp. Since these two close compensating frameshifts result affect only 2 to 4 codons in an otherwise intact exon, we regard them as spurious and an aligner that is aware of the reading frame should not report any frameshift. The true alignment is therefore the alignment that does not have any frameshift.

## Two compensating frameshifts

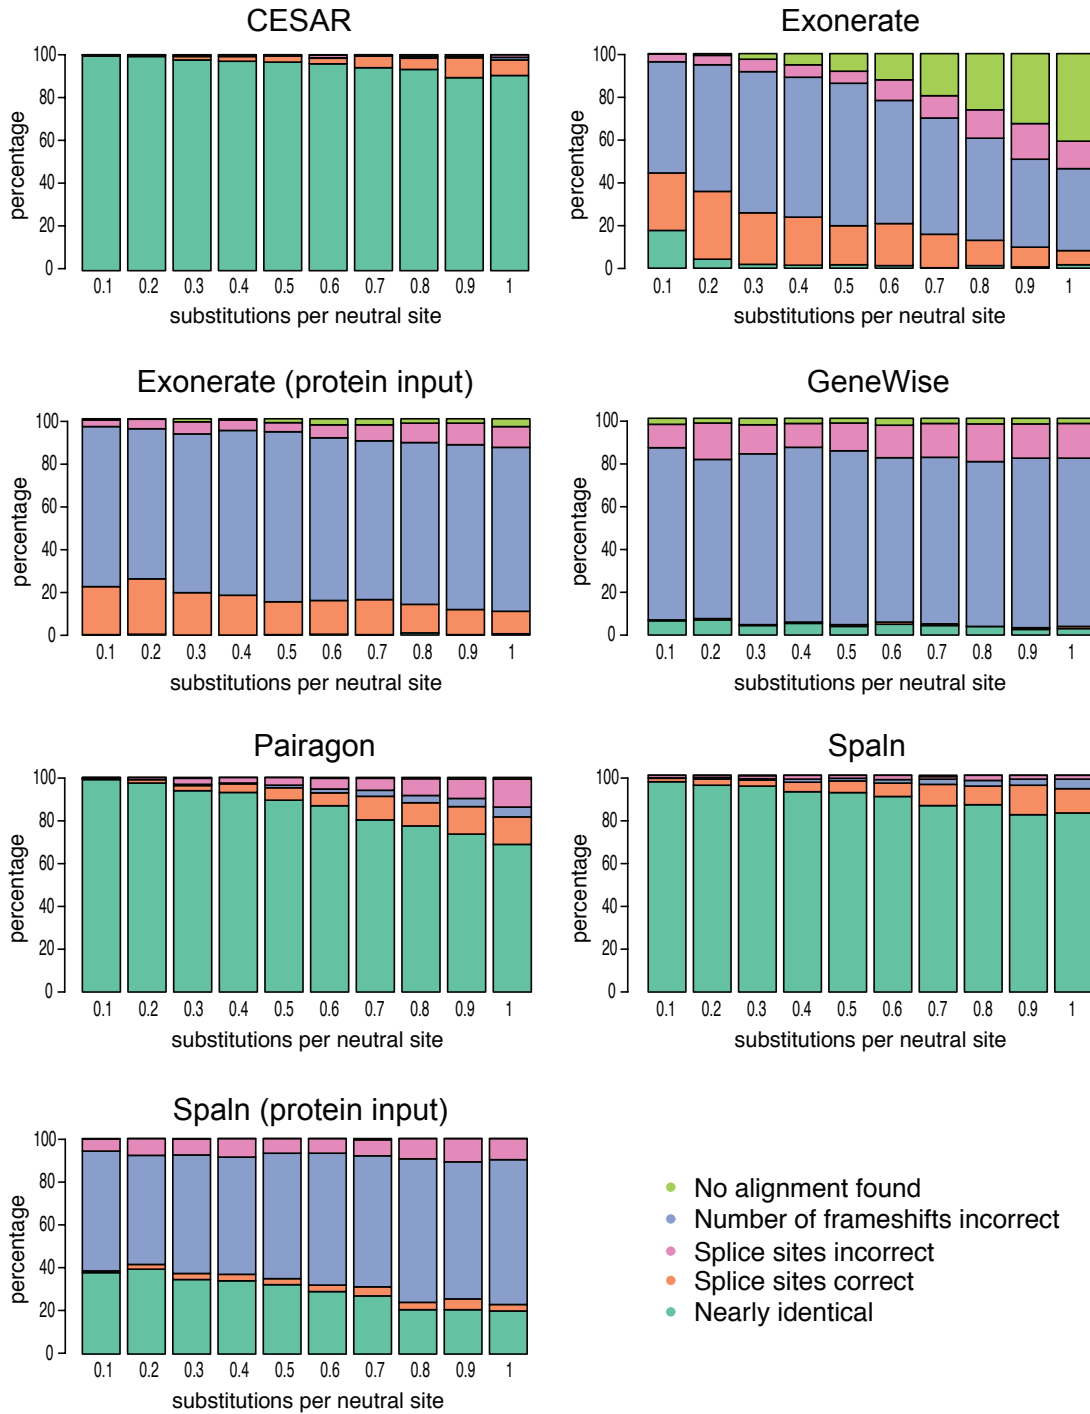

**Supplementary Figure S6:** Detailed breakdown of differences between the reported and true alignment for exons that have two real compensating frameshifts.

This dataset tests if methods report frameshifts that most likely did occur in evolution. In this dataset, we introduced two compensating frameshifting indels that are separated by a large distance (30 to 45 bp). The true alignment has exactly two frameshifts.

## One real frameshift

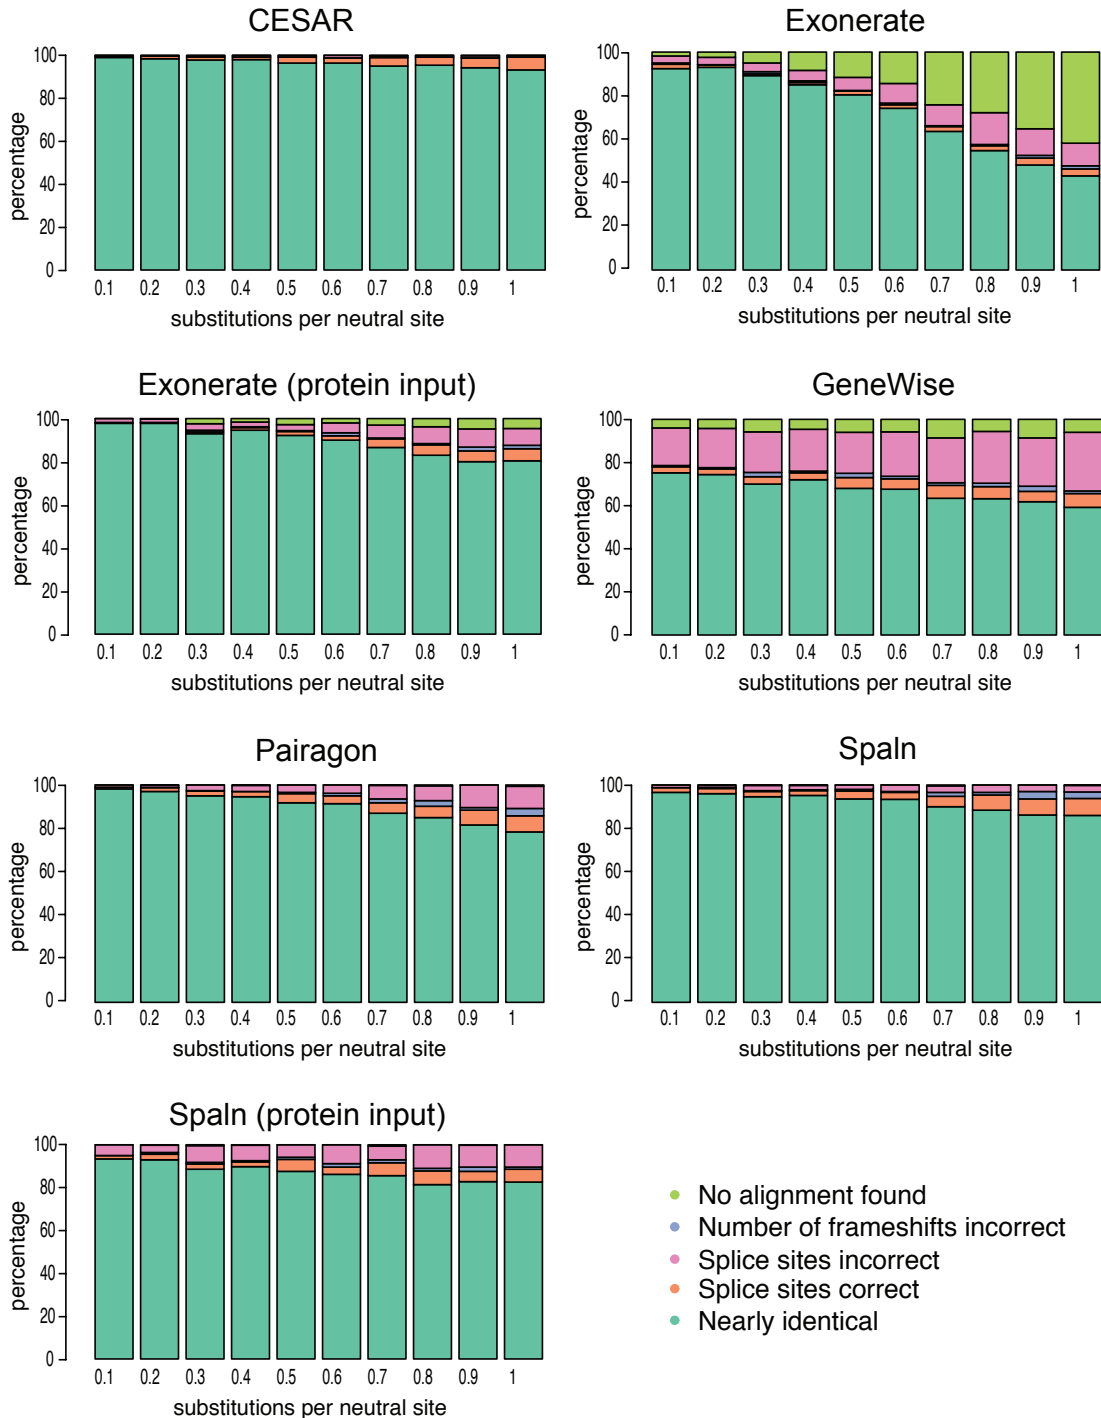

**Supplementary Figure S7:** Detailed breakdown of differences between the reported and true alignment for exons that have exactly one frameshift.

This dataset represents exons that are really inactivated by a frameshift and the true alignment has exactly one frameshift. This dataset also tests if methods avoid frameshifts by any means, which would result in incorrectly inferring exon conservation for exons that are not conserved.



## Splice site shift

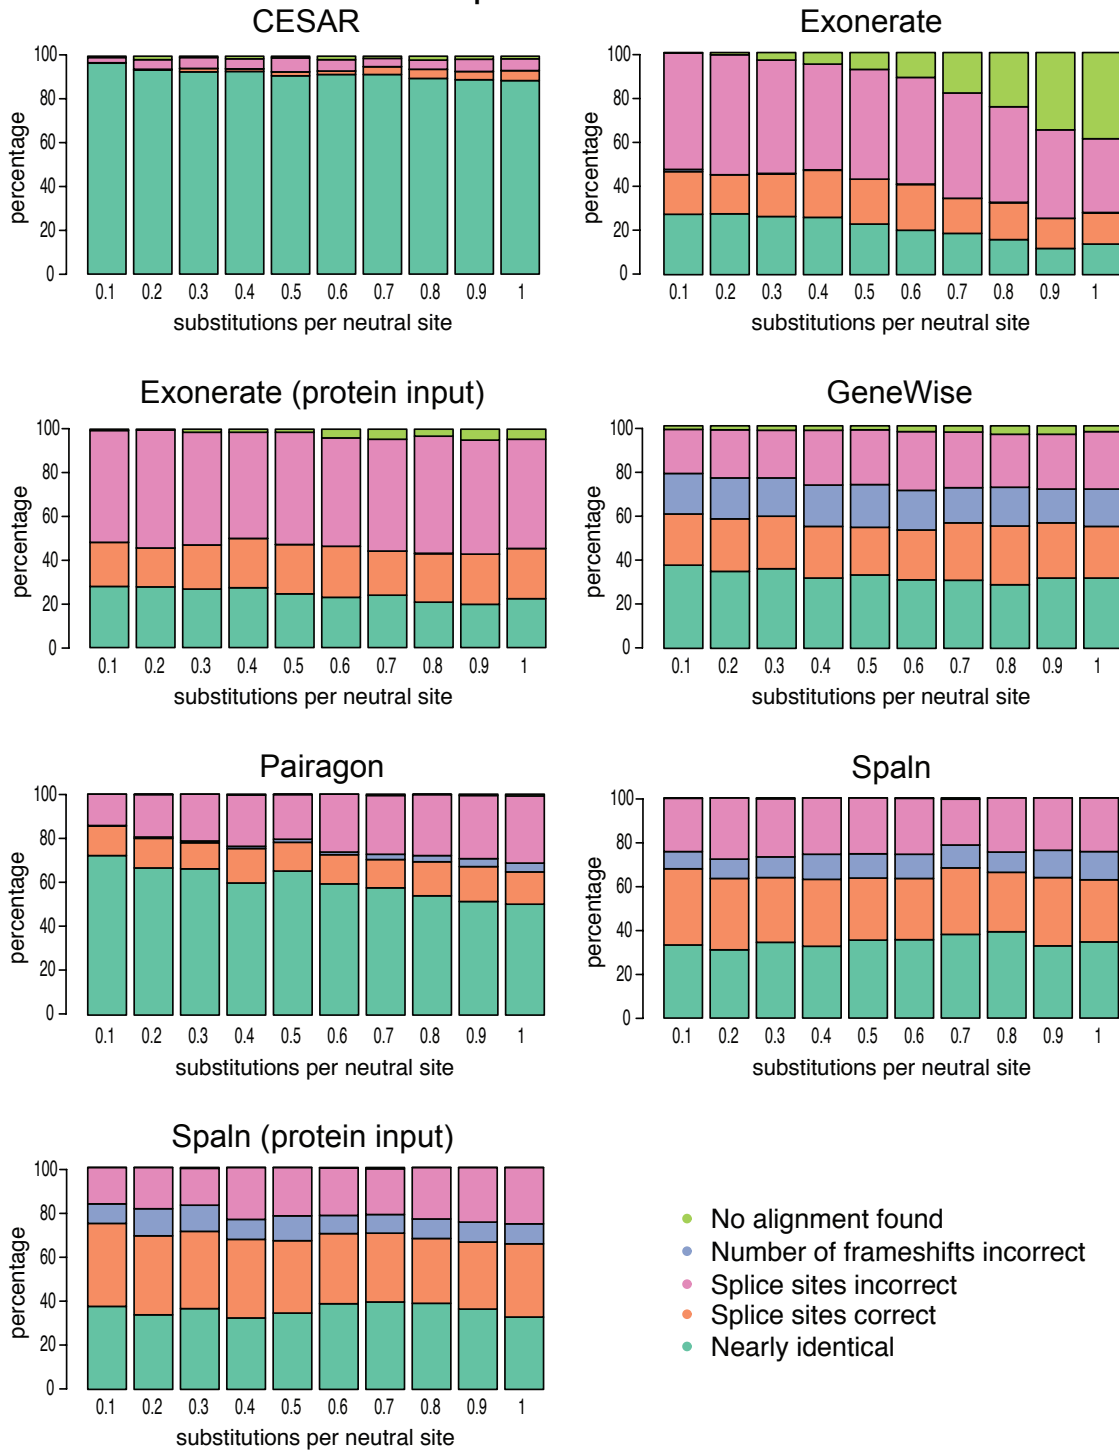

**Supplementary Figure S8:** Detailed breakdown of differences between the reported and true alignment for exons where splice site shifts occurred.

In this dataset, one splice site was shifted by a distance obtained by sampling from the distribution of real splice site shifts. The true alignment here has no frameshift and the shifted splice site is aligned to the original splice site.

**A** hg19: chr17:72,527,497-72,527,586

human-mouse alignment with two compensating frameshifting indels

```
CAAGCCA---GAGCTCAGGCAGAACTTCCAGAGTGCATCTGGGATCTGCATTTGCCACTGGTTGCAGATC-AGGCGGACGAGGAGCCGGGAAGG
| | | | |   | | | | |   | | | | |   | | | | |   | | | | |   | | | | |   | | | | |   | | | | |   | | | | |   | | | | |
CGAGTCAGCTGAGATC-TCCAGGGCTTTGGGTATCCCGCTGAGATTTGGATTTGCTGCTGGCTGTTTCATCAAGGAGTGCAGCAAAGTGGGAAGG
```

alignment without frameshifting indels

```
CAAGCCA---GAGCTCAGGCAGAACTTCCAGAGTGCATCTGGGATCTGCATTTGCCACTGGTTGCAGATCAGGCGGACGAGGAGCCGGGAAGG
| | | | |   | | | | |   | | | | |   | | | | |   | | | | |   | | | | |   | | | | |   | | | | |   | | | | |   | | | | |
CGAGTCAGCTGAGATCTCCAGGGCTTTGGGTATCCCGCTGAGATTTGGATTTGCTGCTGGCTGTTTCATCAAGGAGTGCAGCAAAGTGGGAAGG
```

**B** hg19: chr11:76,751,532-76,751,619

human-mouse alignment with three compensating frameshifting deletions

```
GCTGTGCGCCAGGCAAGCTGTCAGCCGAAGGGCCAGGATGCCCTCGTGGCCGCTGGGCGCCAGGCCGGCCGGCTCCAGACACATGCC
| | | | | |   | | | | |   | | | | | | | | | | | | | | | | | | | | | | | | | | | | | | | | | | | | | | | | | | | | | |
GCTGCACATTGGGCAGC-TGCACGCCGAAGGGCCG-GATGCCCTGGTGGCTGCTGGGCGCCAGGCCGGCCTGCTG-CAGACACATGCC
```

alignment without frameshifting deletions but a 3 base pair deletion

```
GCTGTGCGCCAGGCAAGCTGTCAGCCGAAGGGCCAGGATGCCCTCGTGGCCGCTGGGCGCCAGGCCGGCCGGCTCCAGACACATGCC
| | | | | |   | | | | |   | | | | |   | | | | |   | | | | |   | | | | |   | | | | |   | | | | |   | | | | |   | | | | |
GCTGCACATTGGGCAGCTGCACGCCGAAGGGCCGGATGCCCTGGTGGCTGCTGGGCGCCAGGCCGGCCTGCTG---CAGACACATGCC
```

**Supplementary Figure S9:** Examples of real compensating frameshifts.

Two (A) and three (B) frameshifts compensate each other and restore the original reading frame. Note that the sequence similarity is substantially lower without these frameshifts, strongly suggesting that these frameshifts did happen in evolution. The frameshifted part is shown in blue, the frameshifts are shown in red.

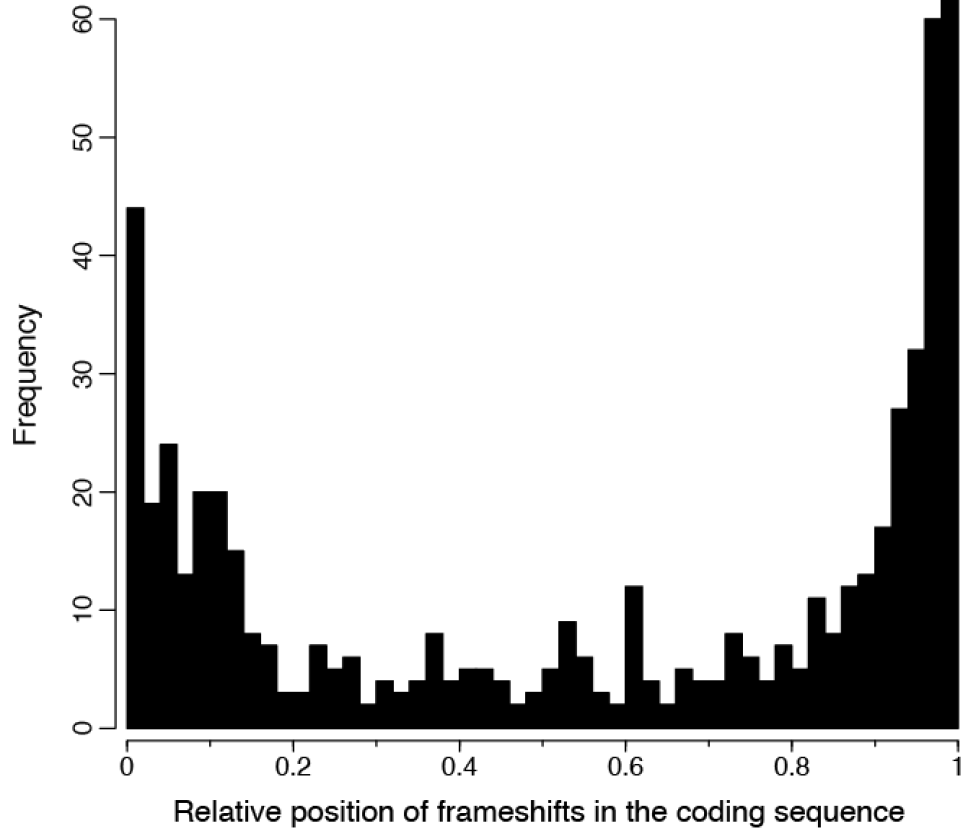

**Supplementary Figure S10:** Relative position of frameshifts in the mouse coding sequence after realigning with CESAR. The histogram shows the relative position of 567 frameshifts that we detect in 149,331 realigned exons in mouse.

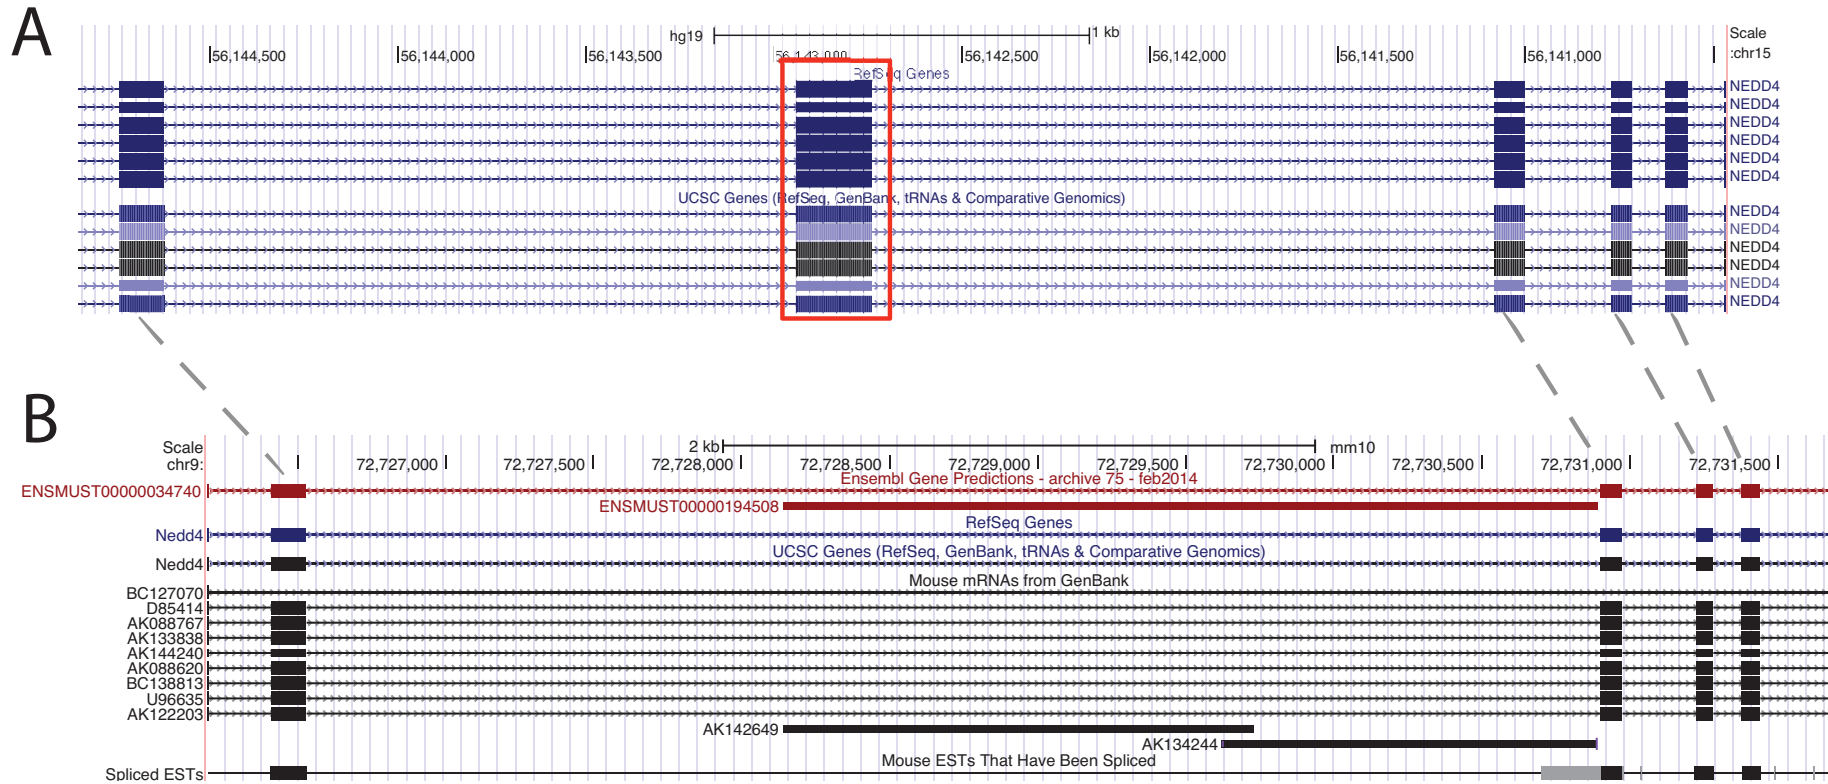

**Supplementary Figure S11: Non-conserved exon in mouse *NEDD4*.**

(A) Human genome browser: CESAR reports a frameshift in the highlighted exon in mouse.

(B) Mouse RefSeq, UCSC, Ensembl and MGC gene annotations and several mRNAs and ESTs show that this exon does not exist in mouse. Grey dashed lines indicate orthologous exons.

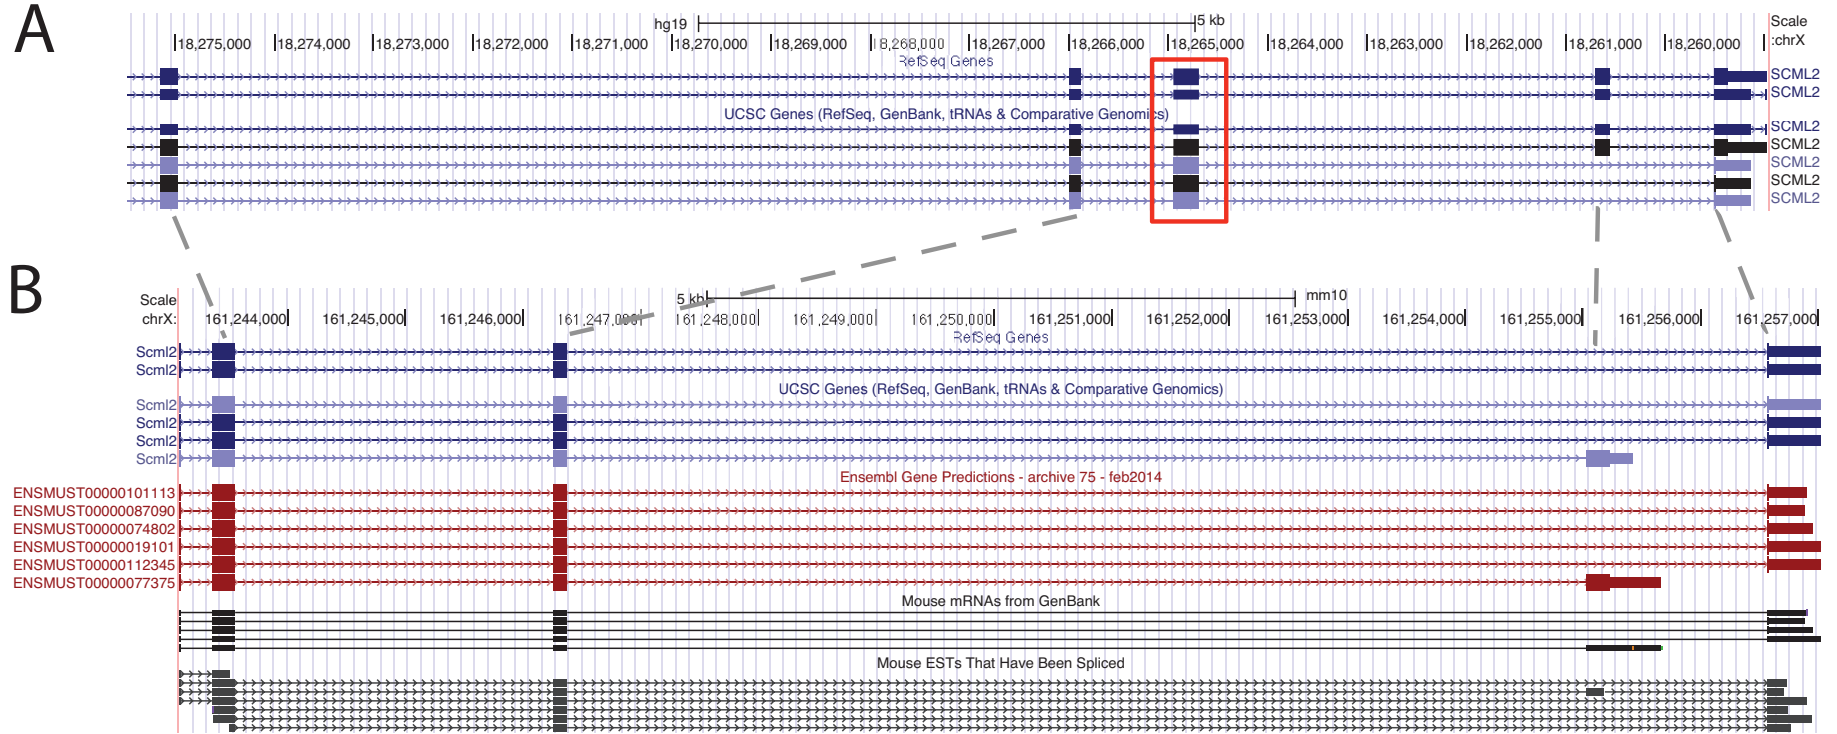

**Supplementary Figure S12: Non-conserved exon in mouse *SCML2*.**

(A) Human genome browser: CESAR reports a frameshift in the highlighted exon in mouse.

(B) Mouse RefSeq, UCSC and Ensembl gene annotations and mRNAs/ESTs show that this exon does not exist in mouse.

Grey dashed lines indicate orthologous exons.

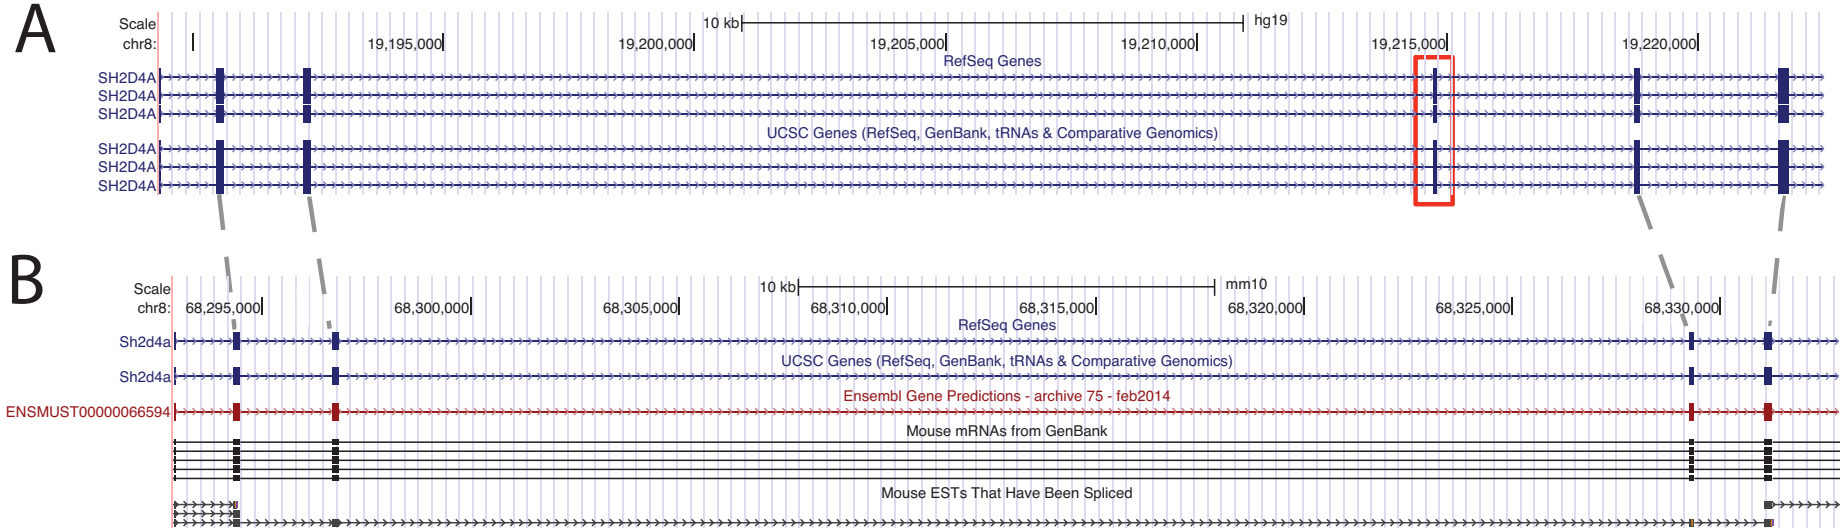

**Supplementary Figure S13: Non-conserved exon in mouse *SH2D4A*.**

(A) Human genome browser: CESAR reports an 11 bp frameshift in the highlighted exon in mouse.

(B) Mouse RefSeq, UCSC and Ensembl gene annotations and mRNAs/ESTs show that this exon does not exist in mouse.

Grey dashed lines indicate orthologous exons.

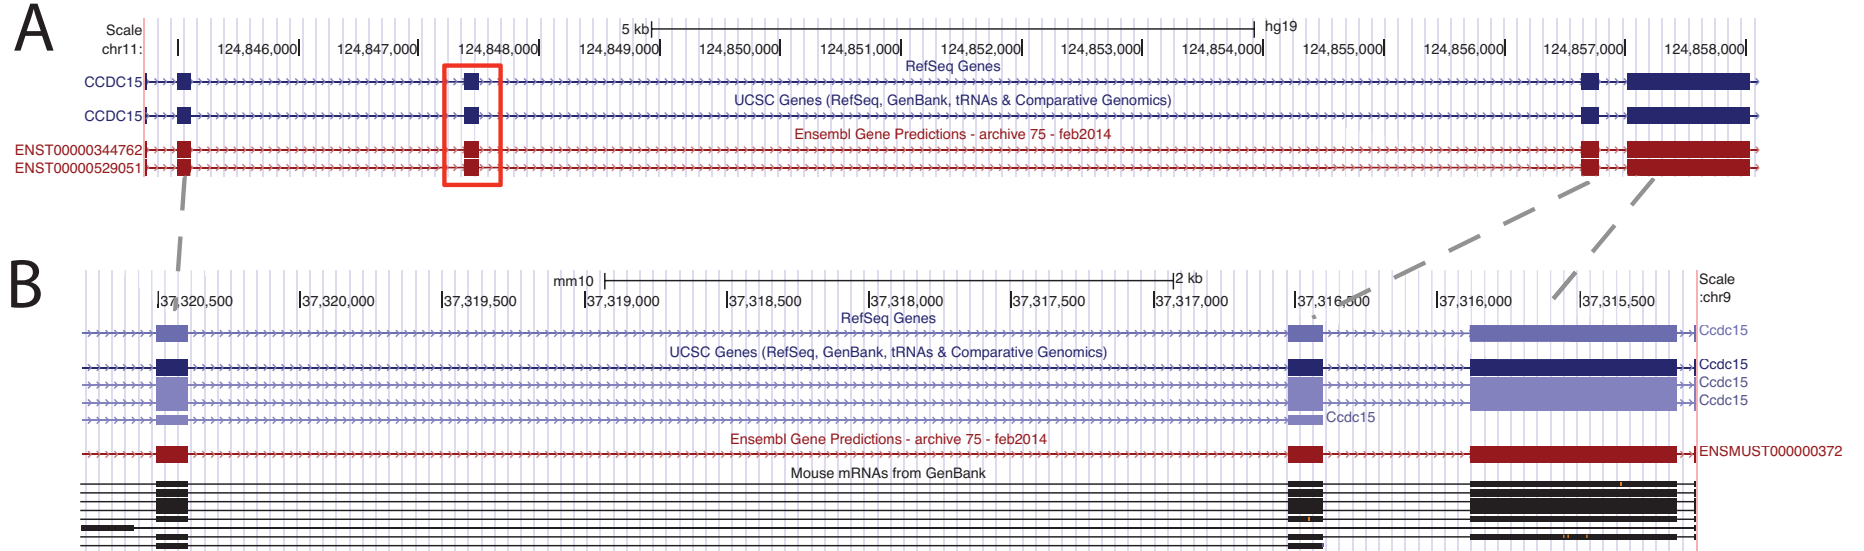

**Supplementary Figure S14: Non-conserved exon in mouse *CCDC15*.**

(A) Human genome browser: CESAR reports both frameshifts and a splice site mutation in the highlighted exon in mouse.

(B) Mouse RefSeq, UCSC and Ensembl gene annotations and mRNAs show that this exon does not exist in mouse.

Grey dashed lines indicate orthologous exons.

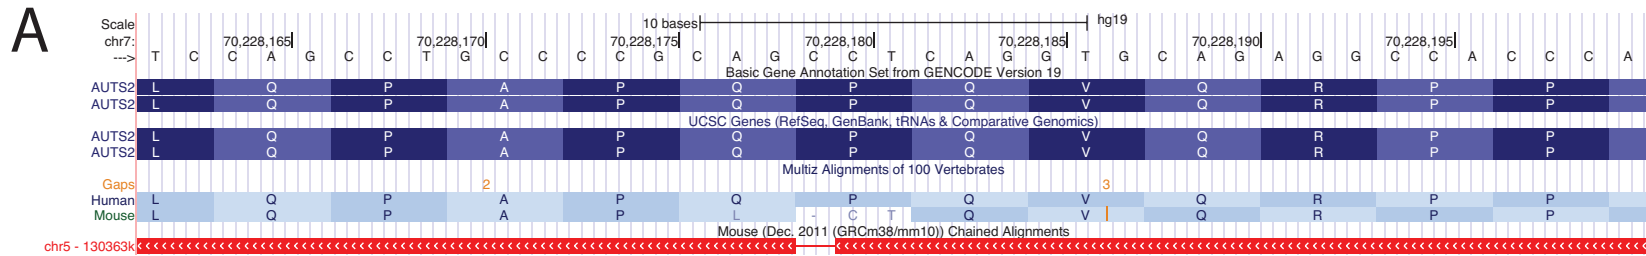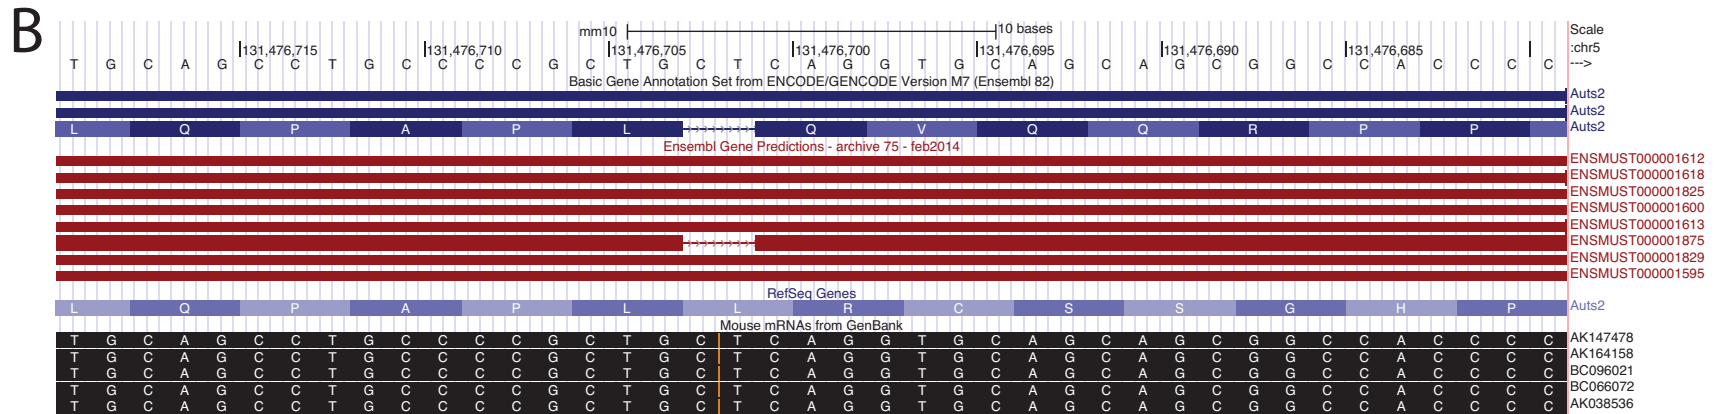

**C**

| Download Graphics FASTA Trace Quality Info                                                       |                                                              |            |          |            | Download Graphics FASTA Trace Quality Info                                                       |                                                              |            |          |           |
|--------------------------------------------------------------------------------------------------|--------------------------------------------------------------|------------|----------|------------|--------------------------------------------------------------------------------------------------|--------------------------------------------------------------|------------|----------|-----------|
| UGC1M0267_R_C09<br>Sequence ID: <a href="#">gnl t 123455343</a> Length: 887 Number of Matches: 1 |                                                              |            |          |            | G10P615178FA9.T0<br>Sequence ID: <a href="#">gnl t 18719429</a> Length: 689 Number of Matches: 1 |                                                              |            |          |           |
| Range 1: 313 to 395 Graphics                                                                     |                                                              |            |          |            | Range 1: 482 to 564 Graphics                                                                     |                                                              |            |          |           |
| Score                                                                                            | Expect                                                       | Identities | Gaps     | Strand     | Score                                                                                            | Expect                                                       | Identities | Gaps     | Strand    |
| 147 bits(79)                                                                                     | 1e-32                                                        | 82/83(99%) | 1/83(1%) | Plus/Minus | 147 bits(79)                                                                                     | 1e-32                                                        | 82/83(99%) | 1/83(1%) | Plus/Plus |
| Query 1                                                                                          | GCTGGGGGACTGGGGCCGGGGTGGCCGCTGCTGCACCTGAG-CAGCGGGGCAGGCTGCAG | 59         |          |            | Query 1                                                                                          | GCTGGGGGACTGGGGCCGGGGTGGCCGCTGCTGCACCTGA-CAGCGGGGCAGGCTGCAG  | 59         |          |           |
| Sbjct 395                                                                                        | GCTGGGGGACTGGGGCCGGGGTGGCCGCTGCTGCACCTGAGGCAGCGGGGCAGGCTGCAG | 336        |          |            | Sbjct 482                                                                                        | GCTGGGGGACTGGGGCCGGGGTGGCCGCTGCTGCACCTGAGGCAGCGGGGCAGGCTGCAG | 541        |          |           |
| Query 60                                                                                         | CTGGGCTTCTGGGGGTCCCTTGGG                                     | 82         |          |            | Query 60                                                                                         | CTGGGCTTCTGGGGGTCCCTTGGG                                     | 82         |          |           |
| Sbjct 335                                                                                        | CTGGGCTTCTGGGGGTCCCTTGGG                                     | 313        |          |            | Sbjct 542                                                                                        | CTGGGCTTCTGGGGGTCCCTTGGG                                     | 564        |          |           |

**Supplementary Figure S15: Assembly error in *AUTS2*.**

(A) The human genome browser shows a 1 bp frameshifting deletion in *AUTS2* in mouse, visible in the multiple genome alignment and the pairwise alignment chain. (B) This 1 bp deletion is an assembly error in mouse. In the mouse genome browser, the GENCODE and Ensembl gene annotation show a 2 bp codon, which misses the single base. All four mRNAs that align to this locus have the base that is missing in the reference genome (orange tick mark). The RefSeq gene annotation is not aware of this assembly error and translates *AUTS2* in a different reading frame that leads to a premature stop codon at the end of this exon. (C) All seven aligning Sanger sequencing reads from the NCBI trace archive have the missing base. The screenshot shows two aligning reads.



**Supplementary Figure S16:**  
Assembly error in *IFI30*.

(A) The human genome browser shows a 1 bp insertion (orange tick mark) in an exon of *IFI30* in mouse.

(B) Mouse genome browser: This insertion is an assembly error as the annotated reading frame simply ignores this insertion and all aligning mRNAs and ESTs do not have this extra base.

(C) All 11 Sanger reads from the NCBI trace archive that align to this region do not have the extra base. The screenshot shows two aligning reads.

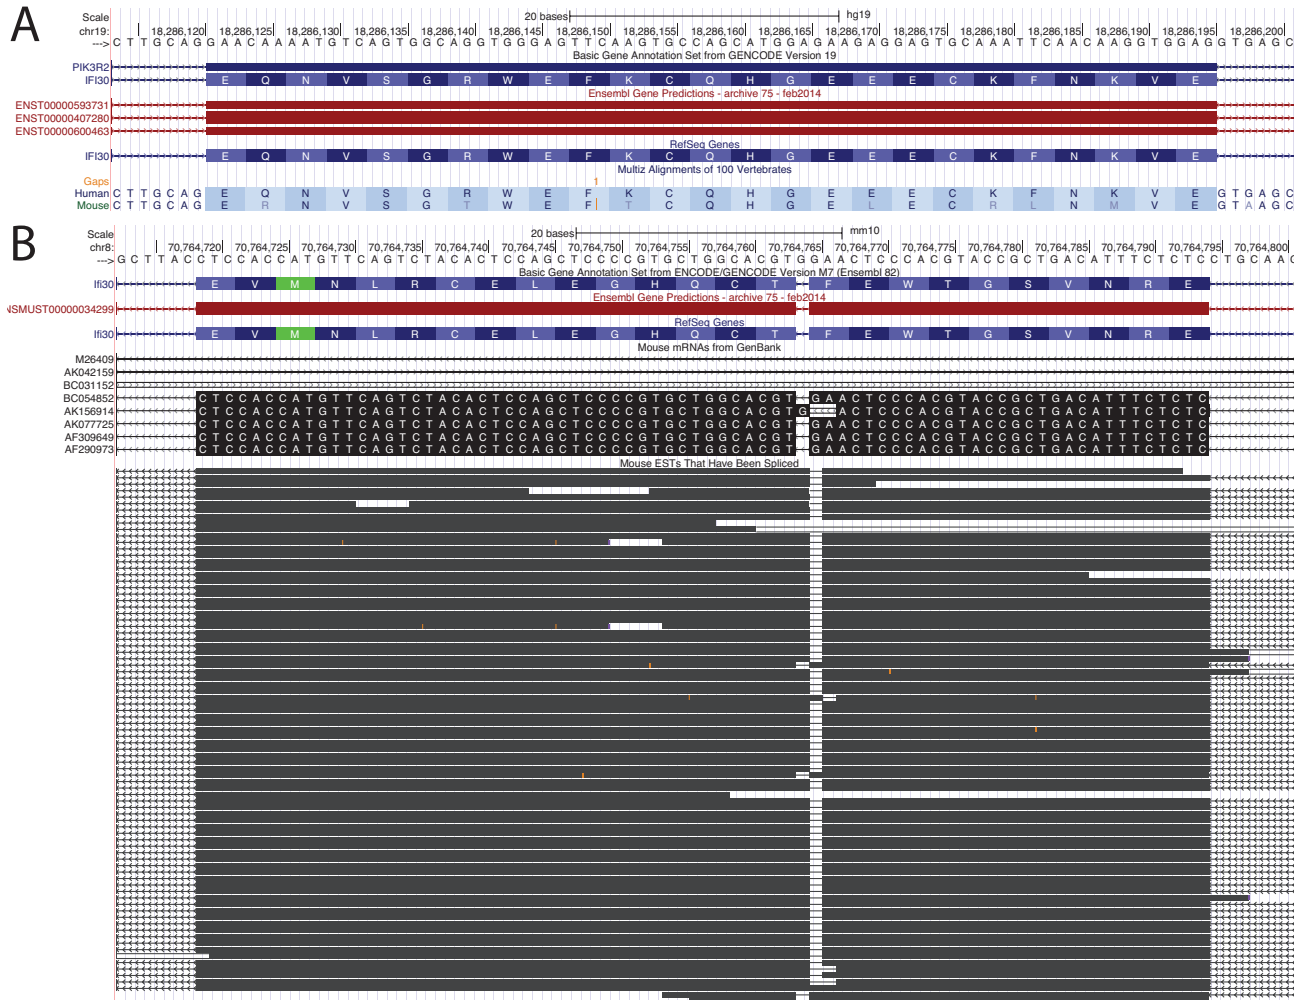

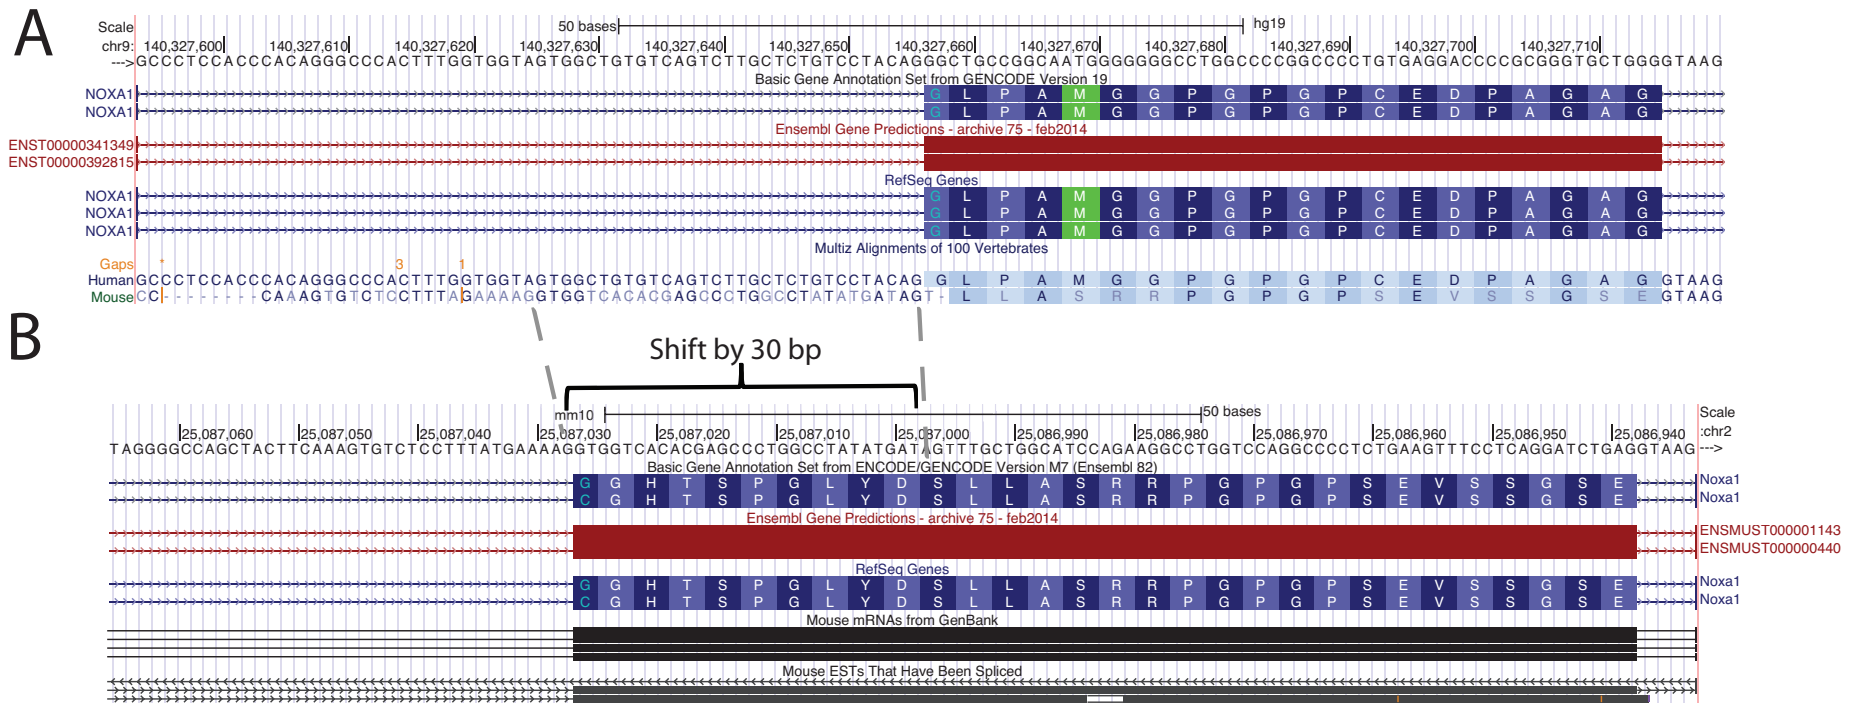

**Supplementary Figure S17: Splice site shift in mouse *NOXA1*.**

(A) The genome alignment of this orthologous mouse exon has a frameshifting 1 bp deletion. Our re-alignment reports a slightly different alignment without the frameshift but with a TA acceptor site.

(B) The mouse genome browser show that the splice site has shifted by 30 bp upstream and is relatively weak (AAG) with a short polypyrimidine tract. The long distance and weak splice site explain why CESAR was not able to align this splice site.

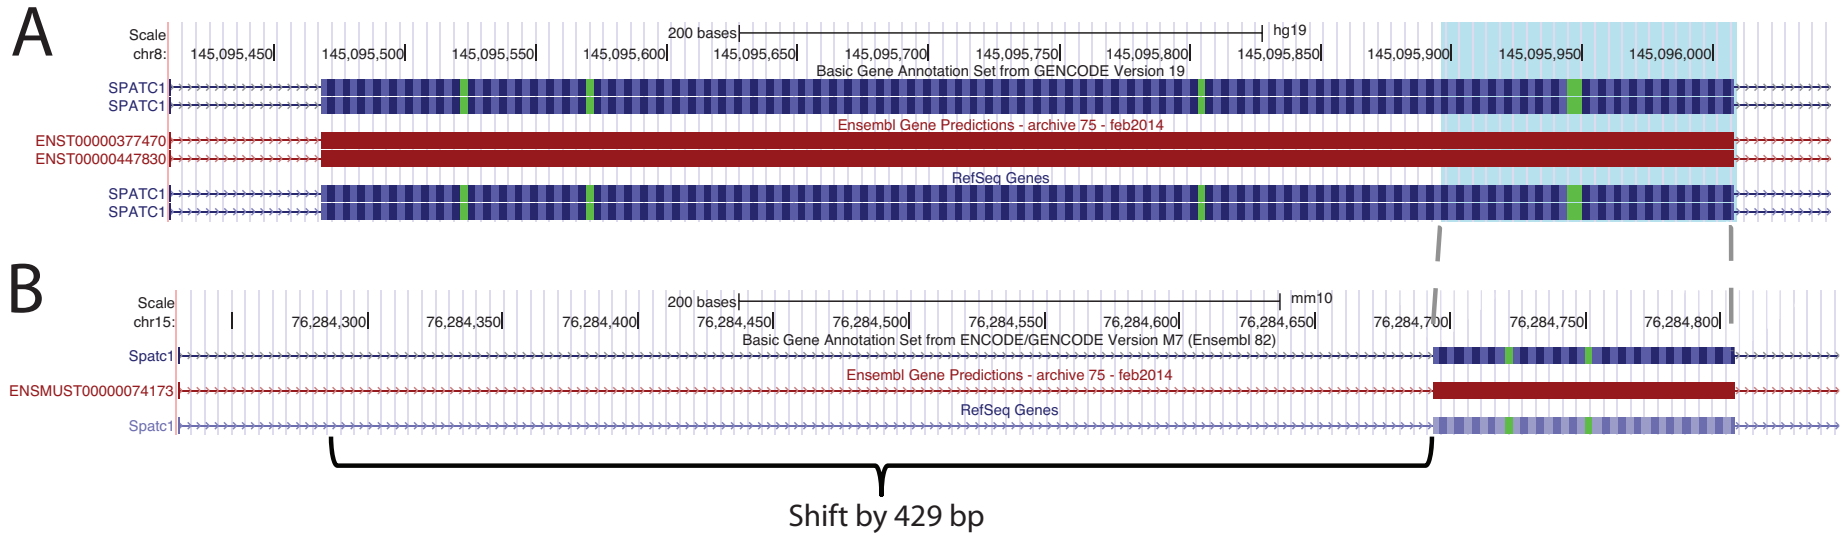

**Supplementary Figure S18: Splice site shift in mouse *SPATC1*.**

(A) The human genome browser shows that this 540 bp exon of *SPATC1* has a splice site mutation in mouse. The mouse exon corresponds to the downstream part highlighted in light blue.

(B) Mouse genome browser shows that mouse has a considerably shorter 111 bp exon. That means the acceptor site that has shifted by 429 bp. The long distance explains why CESAR was not able to align this splice site.



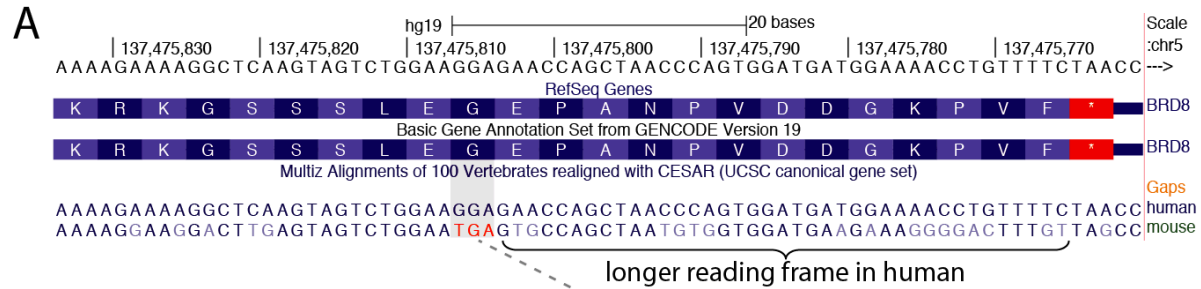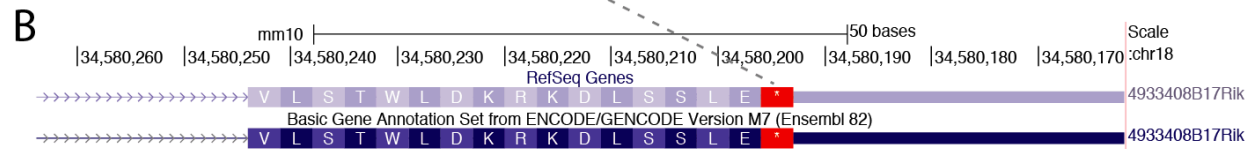

**Supplementary Figure S20: Stop codon shift in mouse *BRD8*.**

(A) The human genome browser shows the last coding exon of *BRD8*. The alignment shows a stop codon mutation in mouse (GGA → TGA).

(B) The mouse genome browser shows the position of the annotated stop codon. Compared to human, the mouse Brd8 C-terminus is 14 amino acids shorter.



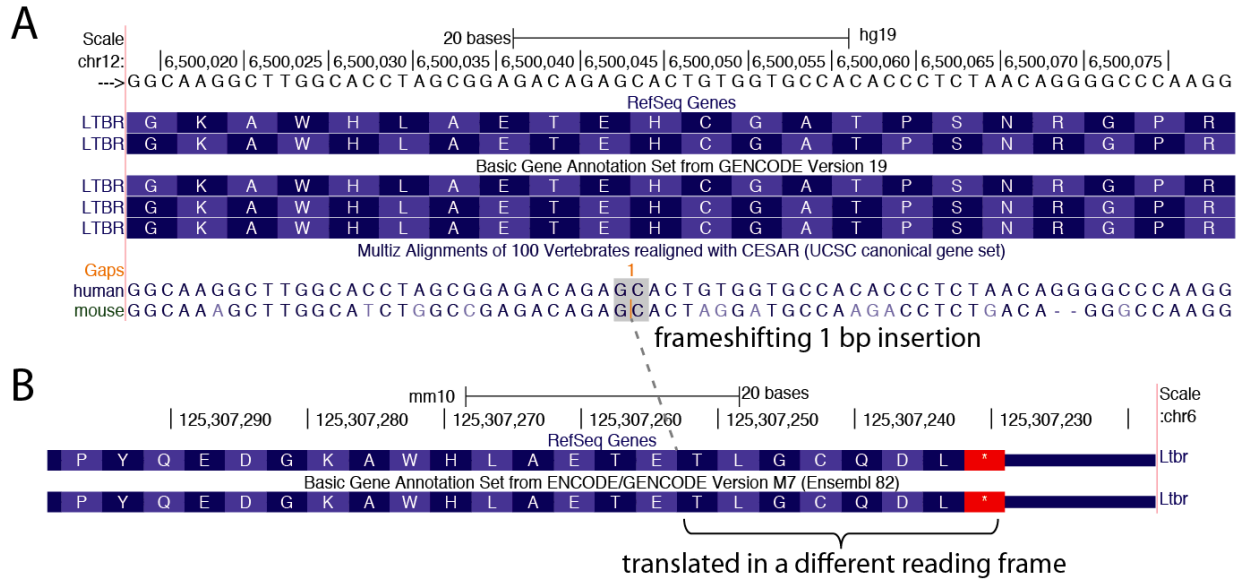

**Supplementary Figure S22: Real frameshift in the last coding exon of *LTBR*.**

(A) The human genome browser shows the last coding exon of *LTBR*. The alignment shows a frameshift in mouse (1 bp insertion – highlighted in gray).

(B) The mouse genome browser shows that the C-terminus of *Ltbr* is translated in a different frame. The dashed line shows the position of the frameshift.

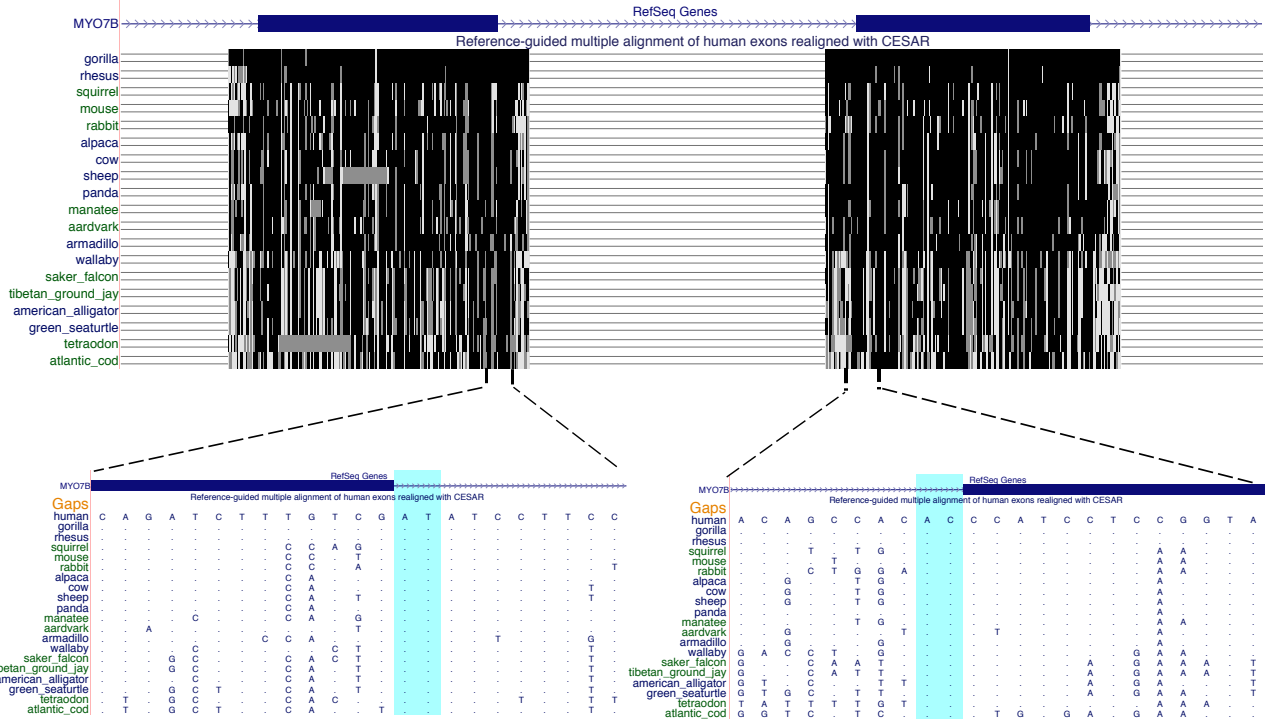

**Supplementary Figure S23:** CESAR alignments of exons flanked by a U12 intron. The *MYO7B* gene (hg19: chr2:128,388,703-128,389,413) contains a U12 intron with an AT donor and an AC acceptor splice site. Using U12 specific splice site profiles, CESAR correctly identifies the conserved AT-AC splice sites.



**Supplementary Table S1:** The probability of deleting codon(s).  
These probabilities were derived from a human-rhesus alignment.

| <b>Number of codons deleted</b> | <b>Probability</b> |
|---------------------------------|--------------------|
| 1                               | 0.00916            |
| 2                               | 0.00396            |
| 3                               | 0.00253            |
| 4                               | 0.00191            |
| 5                               | 0.00150            |
| 6                               | 0.00135            |
| 7                               | 0.00122            |
| 8                               | 0.00116            |
| 9                               | 0.00113            |
| 10                              | 0.00108            |
| <b>Sum</b>                      | <b>0.025</b>       |

**Supplementary Table S2:** The insertion probabilities associated with different sense codons.

| <b>Codon</b> | <b>Codon insertion probability</b> |
|--------------|------------------------------------|
| ACC          | 0.017981249                        |
| ATG          | 0.018984288                        |
| AAG          | 0.022613024                        |
| AAA          | 0.020731263                        |
| ATC          | 0.019797907                        |
| AAC          | 0.018084301                        |
| ATA          | 0.010602242                        |
| AGG          | 0.015901891                        |
| CCT          | 0.019572174                        |
| CTC          | 0.01682396                         |
| AGC          | 0.019045792                        |
| ACA          | 0.019485644                        |
| AGA          | 0.018170669                        |
| CAT          | 0.013882891                        |
| AAT          | 0.016456899                        |
| ATT          | 0.017789867                        |
| CTG          | 0.034270648                        |
| CTA          | 0.0084321                          |
| ACT          | 0.016427456                        |
| CAC          | 0.016768181                        |
| ACG          | 0.007151639                        |
| CAA          | 0.012221466                        |
| AGT          | 0.014247335                        |
| CCA          | 0.020065188                        |
| CCG          | 0.007220994                        |
| CCC          | 0.017115286                        |
| TAT          | 0.014817392                        |
| GGT          | 0.012572496                        |
| TGT          | 0.015166296                        |
| CGA          | 0.010368331                        |
| CAG          | 0.026072787                        |
| CGC          | 0.014941054                        |
| GAT          | 0.017237967                        |
| CGG          | 0.013522864                        |
| CTT          | 0.0149404                          |
| TGC          | 0.016183075                        |
| GGG          | 0.014124981                        |
| GGA          | 0.019038267                        |
| GGC          | 0.018230046                        |
| TAC          | 0.017342818                        |
| GAG          | 0.02179875                         |
| TCG          | 0.005771725                        |
| TTA          | 0.009876462                        |
| TTT          | 0.017288348                        |
| GAC          | 0.016802695                        |
| CGT          | 0.009603293                        |
| GAA          | 0.018091498                        |
| TCA          | 0.016484707                        |
| GCA          | 0.018616245                        |
| GTA          | 0.009152154                        |
| GCC          | 0.021175368                        |
| GTC          | 0.014428412                        |
| GCG          | 0.006742048                        |
| GTG          | 0.026216405                        |
| TTC          | 0.017482347                        |
| GTT          | 0.014378031                        |
| GCT          | 0.020157935                        |
| TTG          | 0.014331903                        |
| TCC          | 0.018710301                        |
| TGG          | 0.016215136                        |
| TCT          | 0.02007582                         |
| <b>Sum</b>   | <b>1.000000</b>                    |

**Supplementary Table S3:** The different parameters that were used to run the spliced aligners that were examined in this study.

| <b>Program</b>                        | <b>Parameters</b>          |
|---------------------------------------|----------------------------|
| Exonerate                             | -model coding2genome -n 1  |
| Exonerate (protein sequence as input) | -model protein2genome -n 1 |
| Spaln                                 | -01 -pw -yX -S1            |
| Spaln (protein sequence as input)     | -01 -pw -yX                |
| Pairagon                              | -vulgar -cross -a GMap     |
| GeneWise                              | -genes -pretty -quiet      |

| Mutations | Genome Alignment            |             |                       | realigned with CESAR        |             |                       |
|-----------|-----------------------------|-------------|-----------------------|-----------------------------|-------------|-----------------------|
|           | Exon-inactivating mutations | Frameshifts | Splice site mutations | Exon-inactivating mutations | Frameshifts | Splice site mutations |
| Species   |                             |             |                       |                             |             |                       |
| Mouse     | 11937                       | 9046        | 2891                  | 794                         | 614         | 180                   |
| Rat       | 12248                       | 9197        | 3051                  | 1084                        | 793         | 291                   |
| Cow       | 14377                       | 11859       | 2518                  | 1418                        | 1185        | 233                   |
| Dog       | 14574                       | 11834       | 2740                  | 1307                        | 1042        | 265                   |

| Mutated Exons | Genome alignment                  |       |                             |       | realigned with CESAR                  |       |                                                         |       |                                   |       |                             |       |                                       |       |                                                         |       |
|---------------|-----------------------------------|-------|-----------------------------|-------|---------------------------------------|-------|---------------------------------------------------------|-------|-----------------------------------|-------|-----------------------------|-------|---------------------------------------|-------|---------------------------------------------------------|-------|
|               | Exons with inactivating mutations |       | Exons with only frameshifts |       | Exons with only splice site mutations |       | Exons with both frameshifting and splice site mutations |       | Exons with inactivating mutations |       | Exons with only frameshifts |       | Exons with only splice site mutations |       | Exons with both frameshifting and splice site mutations |       |
| Species       |                                   |       |                             |       |                                       |       |                                                         |       |                                   |       |                             |       |                                       |       |                                                         |       |
| Mouse         | 5772                              | 3,87% | 2980                        | 2,00% | 1796                                  | 1,20% | 996                                                     | 0,67% | 580                               | 0,39% | 408                         | 0,27% | 135                                   | 0,09% | 37                                                      | 0,02% |
| Rat           | 6099                              | 4,15% | 3154                        | 2,15% | 1870                                  | 1,27% | 1075                                                    | 0,73% | 807                               | 0,55% | 557                         | 0,38% | 207                                   | 0,14% | 43                                                      | 0,03% |
| Cow           | 6226                              | 4,24% | 3763                        | 2,56% | 1602                                  | 1,09% | 861                                                     | 0,59% | 1002                              | 0,68% | 816                         | 0,56% | 160                                   | 0,11% | 26                                                      | 0,02% |
| Dog           | 6296                              | 4,27% | 3634                        | 2,46% | 1732                                  | 1,17% | 930                                                     | 0,63% | 959                               | 0,65% | 738                         | 0,50% | 183                                   | 0,12% | 38                                                      | 0,03% |

| Mutated Genes | Genome alignment                  |       |                             |       | realigned with CESAR                  |      |                                                         |      |                                   |      |                             |      |                                       |      |                                                         |      |
|---------------|-----------------------------------|-------|-----------------------------|-------|---------------------------------------|------|---------------------------------------------------------|------|-----------------------------------|------|-----------------------------|------|---------------------------------------|------|---------------------------------------------------------|------|
|               | Genes with inactivating mutations |       | Genes with only frameshifts |       | Genes with only splice site mutations |      | Genes with both frameshifting and splice site mutations |      | Genes with inactivating mutations |      | Genes with only frameshifts |      | Genes with only splice site mutations |      | Genes with both frameshifting and splice site mutations |      |
| Species       |                                   |       |                             |       |                                       |      |                                                         |      |                                   |      |                             |      |                                       |      |                                                         |      |
| Mouse         | 4425                              | 32,8% | 2149                        | 15,9% | 1084                                  | 8,0% | 1192                                                    | 8,8% | 470                               | 3,5% | 348                         | 2,6% | 82                                    | 0,6% | 40                                                      | 0,3% |
| Rat           | 4597                              | 34,1% | 2216                        | 16,4% | 1074                                  | 8,0% | 1307                                                    | 9,7% | 665                               | 4,9% | 485                         | 3,6% | 120                                   | 0,9% | 60                                                      | 0,4% |
| Cow           | 4666                              | 34,6% | 2603                        | 19,3% | 913                                   | 6,8% | 1150                                                    | 8,5% | 858                               | 6,4% | 716                         | 5,3% | 97                                    | 0,7% | 45                                                      | 0,3% |
| Dog           | 4766                              | 35,3% | 2548                        | 18,9% | 1010                                  | 7,5% | 1208                                                    | 8,9% | 842                               | 6,2% | 660                         | 4,9% | 122                                   | 0,9% | 60                                                      | 0,4% |

**Supplementary Table S4:** A break down of the number of mutations observed in genome alignments and after realigning with CESAR.

| Assembly   | Species                | distance to human<br>(substitutions per<br>neutral site) | intact exons |                               | genes with at least one<br>intact exon |                           | genes where all exons are<br>intact |                           |
|------------|------------------------|----------------------------------------------------------|--------------|-------------------------------|----------------------------------------|---------------------------|-------------------------------------|---------------------------|
|            |                        |                                                          | number       | percent of<br>188788<br>exons | number                                 | percent of<br>19865 genes | number                              | percent of<br>19865 genes |
| panTro4    | Chimp                  | 0,013                                                    | 179898       | 95,29                         | 19102                                  | 96,16                     | 15158                               | 76,31                     |
| gorGor3    | Gorilla                | 0,017                                                    | 174526       | 92,45                         | 18581                                  | 93,54                     | 13748                               | 69,21                     |
| ponAbe2    | Orangutan              | 0,036                                                    | 171362       | 90,77                         | 18247                                  | 91,86                     | 11848                               | 59,64                     |
| nomLeu3    | Gibbon                 | 0,042                                                    | 174304       | 92,33                         | 18440                                  | 92,83                     | 12019                               | 60,50                     |
| rheMac3    | Rhesus                 | 0,070                                                    | 177902       | 94,23                         | 18506                                  | 93,16                     | 13136                               | 66,13                     |
| M macFas5  | Crab-eating macaque    | 0,069                                                    | 182427       | 96,63                         | 18767                                  | 94,47                     | 16231                               | 81,71                     |
| A papHam1  | Baboon                 | 0,070                                                    | 174640       | 92,51                         | 17913                                  | 90,17                     | 13145                               | 66,17                     |
| M chlSab1  | Green monkey           | 0,070                                                    | 183027       | 96,95                         | 18733                                  | 94,30                     | 16471                               | 82,92                     |
| M calJac3  | Marmoset               | 0,122                                                    | 173871       | 92,10                         | 18058                                  | 90,90                     | 12119                               | 61,01                     |
| A saiBol1  | Squirrel monkey        | 0,121                                                    | 176982       | 93,75                         | 18203                                  | 91,63                     | 13169                               | 66,29                     |
| L otoGar3  | Bushbaby               | 0,272                                                    | 177235       | 93,88                         | 18041                                  | 90,82                     | 13665                               | 68,79                     |
| S tupChi1  | Chinese tree shrew     | 0,324                                                    | 172467       | 91,36                         | 17517                                  | 88,18                     | 10888                               | 54,81                     |
| speTri2    | Squirrel               | 0,331                                                    | 174631       | 92,50                         | 17757                                  | 89,39                     | 13000                               | 65,44                     |
| jacJac1    | Lesser Egyptian jerboa | 0,432                                                    | 170146       | 90,13                         | 17089                                  | 86,03                     | 11720                               | 59,00                     |
| micOch1    | Prairie vole           | 0,501                                                    | 172989       | 91,63                         | 17151                                  | 86,34                     | 13454                               | 67,73                     |
| criGri1    | Chinese hamster        | 0,482                                                    | 168945       | 89,49                         | 16897                                  | 85,06                     | 9858                                | 49,63                     |
| mesAur1    | Golden hamster         | 0,495                                                    | 163008       | 86,34                         | 16860                                  | 84,87                     | 10861                               | 54,67                     |
| mm10       | Mouse                  | 0,514                                                    | 176103       | 93,28                         | 17499                                  | 88,09                     | 14428                               | 72,63                     |
| rn5        | Rat                    | 0,520                                                    | 172744       | 91,50                         | 17187                                  | 86,52                     | 12986                               | 65,37                     |
| hetGla2    | Naked mole-rat         | 0,377                                                    | 174191       | 92,27                         | 17475                                  | 87,97                     | 13694                               | 68,94                     |
| cavPor3    | Guinea pig             | 0,433                                                    | 171040       | 90,60                         | 17214                                  | 86,66                     | 11352                               | 57,15                     |
| chiLan1    | Chinchilla             | 0,412                                                    | 174014       | 92,17                         | 17507                                  | 88,13                     | 12628                               | 63,57                     |
| octDeg1    | Brush-tailed rat       | 0,451                                                    | 172527       | 91,39                         | 17289                                  | 87,03                     | 12604                               | 63,45                     |
| oryCun2    | Rabbit                 | 0,369                                                    | 160895       | 85,23                         | 16502                                  | 83,07                     | 10749                               | 54,11                     |
| ochPri3    | Pika                   | 0,454                                                    | 169085       | 89,56                         | 17104                                  | 86,10                     | 12167                               | 61,25                     |
| susScr3    | Pig                    | 0,367                                                    | 159686       | 84,59                         | 16818                                  | 84,66                     | 10772                               | 54,23                     |
| vicPac2    | Alpaca                 | 0,362                                                    | 173513       | 91,91                         | 17680                                  | 89,00                     | 11466                               | 57,72                     |
| camFer1    | Bactrian camel         | 0,361                                                    | 170853       | 90,50                         | 17605                                  | 88,62                     | 10245                               | 51,57                     |
| turTru2    | Dolphin                | 0,333                                                    | 162710       | 86,19                         | 16582                                  | 83,47                     | 8805                                | 44,32                     |
| orcOrc1    | Killer whale           | 0,332                                                    | 175913       | 93,18                         | 17572                                  | 88,46                     | 14041                               | 70,68                     |
| panHod1    | Tibetan antelope       | 0,399                                                    | 171872       | 91,04                         | 17535                                  | 88,27                     | 10765                               | 54,19                     |
| bosTau7    | Cow                    | 0,434                                                    | 175414       | 92,92                         | 17806                                  | 89,64                     | 13121                               | 66,05                     |
| oviAri3    | Sheep                  | 0,403                                                    | 168934       | 89,48                         | 17472                                  | 87,95                     | 9996                                | 50,32                     |
| capHir1    | Domestic goat          | 0,402                                                    | 167720       | 88,84                         | 17482                                  | 88,00                     | 9468                                | 47,66                     |
| equCab2    | Horse                  | 0,322                                                    | 171452       | 90,82                         | 17646                                  | 88,83                     | 10322                               | 51,96                     |
| cerSim1    | White rhinoceros       | 0,303                                                    | 178141       | 94,36                         | 17943                                  | 90,33                     | 14231                               | 71,64                     |
| felCat5    | Cat                    | 0,348                                                    | 173555       | 91,93                         | 17793                                  | 89,57                     | 11159                               | 56,17                     |
| canFam3    | Dog                    | 0,369                                                    | 176094       | 93,28                         | 17910                                  | 90,16                     | 12866                               | 64,77                     |
| musFur1    | Ferret                 | 0,392                                                    | 175775       | 93,11                         | 17814                                  | 89,68                     | 13046                               | 65,67                     |
| ailMel1    | Panda                  | 0,365                                                    | 172388       | 91,31                         | 17308                                  | 87,13                     | 11723                               | 59,01                     |
| odoRosDiv1 | Pacific walrus         | 0,358                                                    | 178257       | 94,42                         | 17807                                  | 89,64                     | 14682                               | 73,91                     |
| lepWed1    | Weddell seal           | 0,355                                                    | 170627       | 90,38                         | 17133                                  | 86,25                     | 12659                               | 63,73                     |
| pteAle1    | Black flying-fox       | 0,350                                                    | 174642       | 92,51                         | 17581                                  | 88,50                     | 12431                               | 62,58                     |
| pteVam1    | Megabat                | 0,351                                                    | 153684       | 81,41                         | 16789                                  | 84,52                     | 6234                                | 31,38                     |
| myoDav1    | David's myotis (bat)   | 0,392                                                    | 164806       | 87,30                         | 16872                                  | 84,93                     | 8790                                | 44,25                     |
| myoLuc2    | Microbat               | 0,381                                                    | 158460       | 83,94                         | 16358                                  | 82,35                     | 9641                                | 48,53                     |
| eptFus1    | Big brown bat          | 0,381                                                    | 172205       | 91,22                         | 17308                                  | 87,13                     | 12523                               | 63,04                     |
| eriEur2    | Hedgehog               | 0,467                                                    | 161747       | 85,68                         | 16015                                  | 80,62                     | 11810                               | 59,45                     |
| sorAra2    | Shrew                  | 0,528                                                    | 157817       | 83,60                         | 15966                                  | 80,37                     | 10026                               | 50,47                     |
| conCri1    | Star-nosed mole        | 0,402                                                    | 161113       | 85,34                         | 16428                                  | 82,70                     | 11876                               | 59,78                     |
| loxAfr3    | Elephant               | 0,362                                                    | 171382       | 90,78                         | 17562                                  | 88,41                     | 11064                               | 55,70                     |
| eleEdw1    | Cape elephant shrew    | 0,497                                                    | 167221       | 88,58                         | 16453                                  | 82,82                     | 12564                               | 63,25                     |
| triMan1    | Manatee                | 0,345                                                    | 175256       | 92,83                         | 17689                                  | 89,05                     | 13277                               | 66,84                     |
| chrAsi1    | Cape golden mole       | 0,421                                                    | 173975       | 92,15                         | 17327                                  | 87,22                     | 13672                               | 68,83                     |
| echTel2    | Tenrec                 | 0,507                                                    | 165703       | 87,77                         | 16912                                  | 85,14                     | 10228                               | 51,49                     |
| oryAfe1    | Aardvark               | 0,366                                                    | 173459       | 91,88                         | 17453                                  | 87,86                     | 12946                               | 65,17                     |
| dasNov3    | Armadillo              | 0,353                                                    | 166767       | 88,34                         | 17187                                  | 86,52                     | 10644                               | 53,58                     |
| monDom5    | Opossum                | 0,778                                                    | 167167       | 88,55                         | 17571                                  | 88,45                     | 10347                               | 52,09                     |
| sarHar1    | Tasmanian devil        | 0,797                                                    | 160701       | 85,12                         | 17227                                  | 86,72                     | 7751                                | 39,02                     |
| macEug2    | Wallaby                | 0,778                                                    | 120532       | 63,85                         | 15526                                  | 78,16                     | 2669                                | 13,44                     |
| ornAna1    | Platypus               | 0,968                                                    | 129515       | 68,60                         | 15033                                  | 75,68                     | 4346                                | 21,88                     |

**Supplementary Table S5** (part 1): Percent of human exons and genes that we annotate in 99 non-human vertebrates. Continued on the next page.

| Assembly | Species | distance to human<br>(substitutions per<br>neutral site) | intact exons |                               | genes with at least one<br>intact exon |                           | genes where all exons are<br>intact |                           |       |
|----------|---------|----------------------------------------------------------|--------------|-------------------------------|----------------------------------------|---------------------------|-------------------------------------|---------------------------|-------|
|          |         |                                                          | number       | percent of<br>188788<br>exons | number                                 | percent of<br>19865 genes | number                              | percent of<br>19865 genes |       |
|          | falChe1 | Saker falcon                                             | 1,197        | 118446                        | 62,74                                  | 13695                     | 68,94                               | 2971                      | 14,96 |
| S        | falPer1 | Peregrine falcon                                         | 1,197        | 119653                        | 63,38                                  | 13862                     | 69,78                               | 3128                      | 15,75 |
| A        | ficAlb2 | Collared flycatcher                                      | 1,336        | 116148                        | 61,52                                  | 13438                     | 67,65                               | 3310                      | 16,66 |
| U        | zonAlb1 | White-throated sparrow                                   | 1,375        | 111363                        | 58,99                                  | 12924                     | 65,06                               | 3286                      | 16,54 |
| R        | geoFor1 | Medium ground finch                                      | 1,350        | 113874                        | 60,32                                  | 13291                     | 66,91                               | 2650                      | 13,34 |
| O        | taeGut2 | Zebra finch                                              | 1,349        | 138125                        | 73,16                                  | 15205                     | 76,54                               | 4644                      | 23,38 |
| P        | pseHum1 | Tibetan ground jay                                       | 1,313        | 124539                        | 65,97                                  | 14241                     | 71,69                               | 4791                      | 24,12 |
| S        | melUnd1 | Budgerigar                                               | 1,235        | 115388                        | 61,12                                  | 13443                     | 67,67                               | 3482                      | 17,53 |
| I        | amaVit1 | Parrot                                                   | 1,260        | 109715                        | 58,12                                  | 13319                     | 67,05                               | 2786                      | 14,03 |
| D        | araMac1 | Scarlet macaw                                            | 1,276        | 100007                        | 52,97                                  | 13047                     | 65,68                               | 2016                      | 10,15 |
| A        | colLiv1 | Rock pigeon                                              | 1,227        | 116580                        | 61,75                                  | 13687                     | 68,90                               | 2855                      | 14,37 |
|          | anaPla1 | Mallard duck                                             | 1,207        | 111240                        | 58,92                                  | 13165                     | 66,27                               | 2446                      | 12,31 |
|          | galGal4 | Chicken                                                  | 1,242        | 120518                        | 63,84                                  | 13841                     | 69,68                               | 4135                      | 20,82 |
|          | melGal1 | Turkey                                                   | 1,264        | 135159                        | 71,59                                  | 15035                     | 75,69                               | 3514                      | 17,69 |
|          | allMis1 | American alligator                                       | 1,057        | 156967                        | 83,15                                  | 16777                     | 84,46                               | 7405                      | 37,28 |
|          | cheMyd1 | Green sea turtle                                         | 0,998        | 149938                        | 79,42                                  | 16415                     | 82,63                               | 5199                      | 26,17 |
|          | chrPic1 | Painted turtle                                           | 1,004        | 153944                        | 81,54                                  | 16810                     | 84,62                               | 6897                      | 34,72 |
|          | pelSin1 | Chinese softshell turtle                                 | 1,053        | 142844                        | 75,66                                  | 16358                     | 82,35                               | 4798                      | 24,15 |
|          | apaSpi1 | Spiny softshell turtle                                   | 1,104        | 128666                        | 68,15                                  | 15497                     | 78,01                               | 3071                      | 15,46 |
|          | anoCar2 | Lizard                                                   | 1,272        | 139306                        | 73,79                                  | 15571                     | 78,38                               | 5056                      | 25,45 |
|          | xenTro7 | X. tropicalis                                            | 1,723        | 131987                        | 69,91                                  | 15107                     | 76,05                               | 4413                      | 22,22 |
|          | latCha1 | Coelacanth                                               | 1,417        | 131129                        | 69,46                                  | 15202                     | 76,53                               | 4150                      | 20,89 |
|          | tetNig2 | Tetraodon                                                | 2,376        | 101546                        | 53,79                                  | 13225                     | 66,57                               | 1919                      | 9,66  |
| T        | fr3     | Fugu                                                     | 2,355        | 108105                        | 57,26                                  | 13526                     | 68,09                               | 2574                      | 12,96 |
| E        | takFla1 | Yellowbelly pufferfish                                   | 2,403        | 97014                         | 51,39                                  | 12780                     | 64,33                               | 1849                      | 9,31  |
| L        | oreNil2 | Nile tilapia                                             | 2,200        | 113542                        | 60,14                                  | 13669                     | 68,81                               | 2755                      | 13,87 |
| E        | neoBri1 | Princess of Burundi                                      | 2,237        | 109593                        | 58,05                                  | 13743                     | 69,18                               | 2458                      | 12,37 |
| O        | hapBur1 | Burton's mouthbreeder                                    | 2,223        | 111824                        | 59,23                                  | 13824                     | 69,59                               | 2601                      | 13,09 |
| S        | mayZeb1 | Zebra mbuna                                              | 2,224        | 111995                        | 59,32                                  | 13808                     | 69,51                               | 2600                      | 13,09 |
| T        | punNye1 | Pundamilia nyererei                                      | 2,228        | 111582                        | 59,10                                  | 13792                     | 69,43                               | 2550                      | 12,84 |
|          | oryLat2 | Medaka                                                   | 2,349        | 108653                        | 57,55                                  | 13531                     | 68,12                               | 2452                      | 12,34 |
| F        | xipMac1 | Southern platyfish                                       | 2,316        | 110660                        | 58,62                                  | 13724                     | 69,09                               | 2535                      | 12,76 |
| I        | gasAcu1 | Stickleback                                              | 2,104        | 112467                        | 59,57                                  | 13684                     | 68,89                               | 2662                      | 13,40 |
| S        | gadMor1 | Atlantic cod                                             | 2,133        | 97172                         | 51,47                                  | 13354                     | 67,22                               | 2083                      | 10,49 |
| H        | danRer7 | Zebrafish                                                | 2,211        | 114799                        | 60,81                                  | 14032                     | 70,64                               | 3042                      | 15,31 |
|          | astMex1 | Mexican tetra (cavefish)                                 | 2,105        | 111496                        | 59,06                                  | 14147                     | 71,22                               | 2822                      | 14,21 |
|          | lepOcu1 | Spotted gar                                              | 1,793        | 125258                        | 66,35                                  | 14834                     | 74,67                               | 3622                      | 18,23 |
|          | petMar2 | Lamprey                                                  | 2,192        | 58439                         | 30,96                                  | 9540                      | 48,02                               | 1069                      | 5,38  |

**Supplementary Table S5** (part 2): Percent of human exons and genes that we annotate in 99 non-human vertebrates. Non-mammalian species.
